# Supplementary material for: Combination of compound screening with an animal model identifies pentamidine to prevent Chlamydia trachomatis infection
Source: PubMed Central journal article supplement — Cell Rep Med. 2024 Jul 8;5(7):101643. doi: 10.1016/j.xcrm.2024.101643 (PMC11293347; doi:10.1016/j.xcrm.2024.101643), 2024-07-08
Supplement: mmc1.pdf [file mmc1.pdf]

**Cell Reports Medicine, Volume 5**

**Supplemental information**

**Combination of compound screening with an animal**

**model identifies pentamidine to prevent**

***Chlamydia trachomatis* infection**

**Katja Knapp, Romana Klasinc, Anna Koren, Magdalena Siller, Ruth Dingelmaier-Hovorka, Mathias Drach, Juan Sanchez, David Chromy, Marlene Kranawetter, Christoph Grimm, Andreas Bergthaler, Stefan Kubicek, Hannes Stockinger, and Georg Stary**

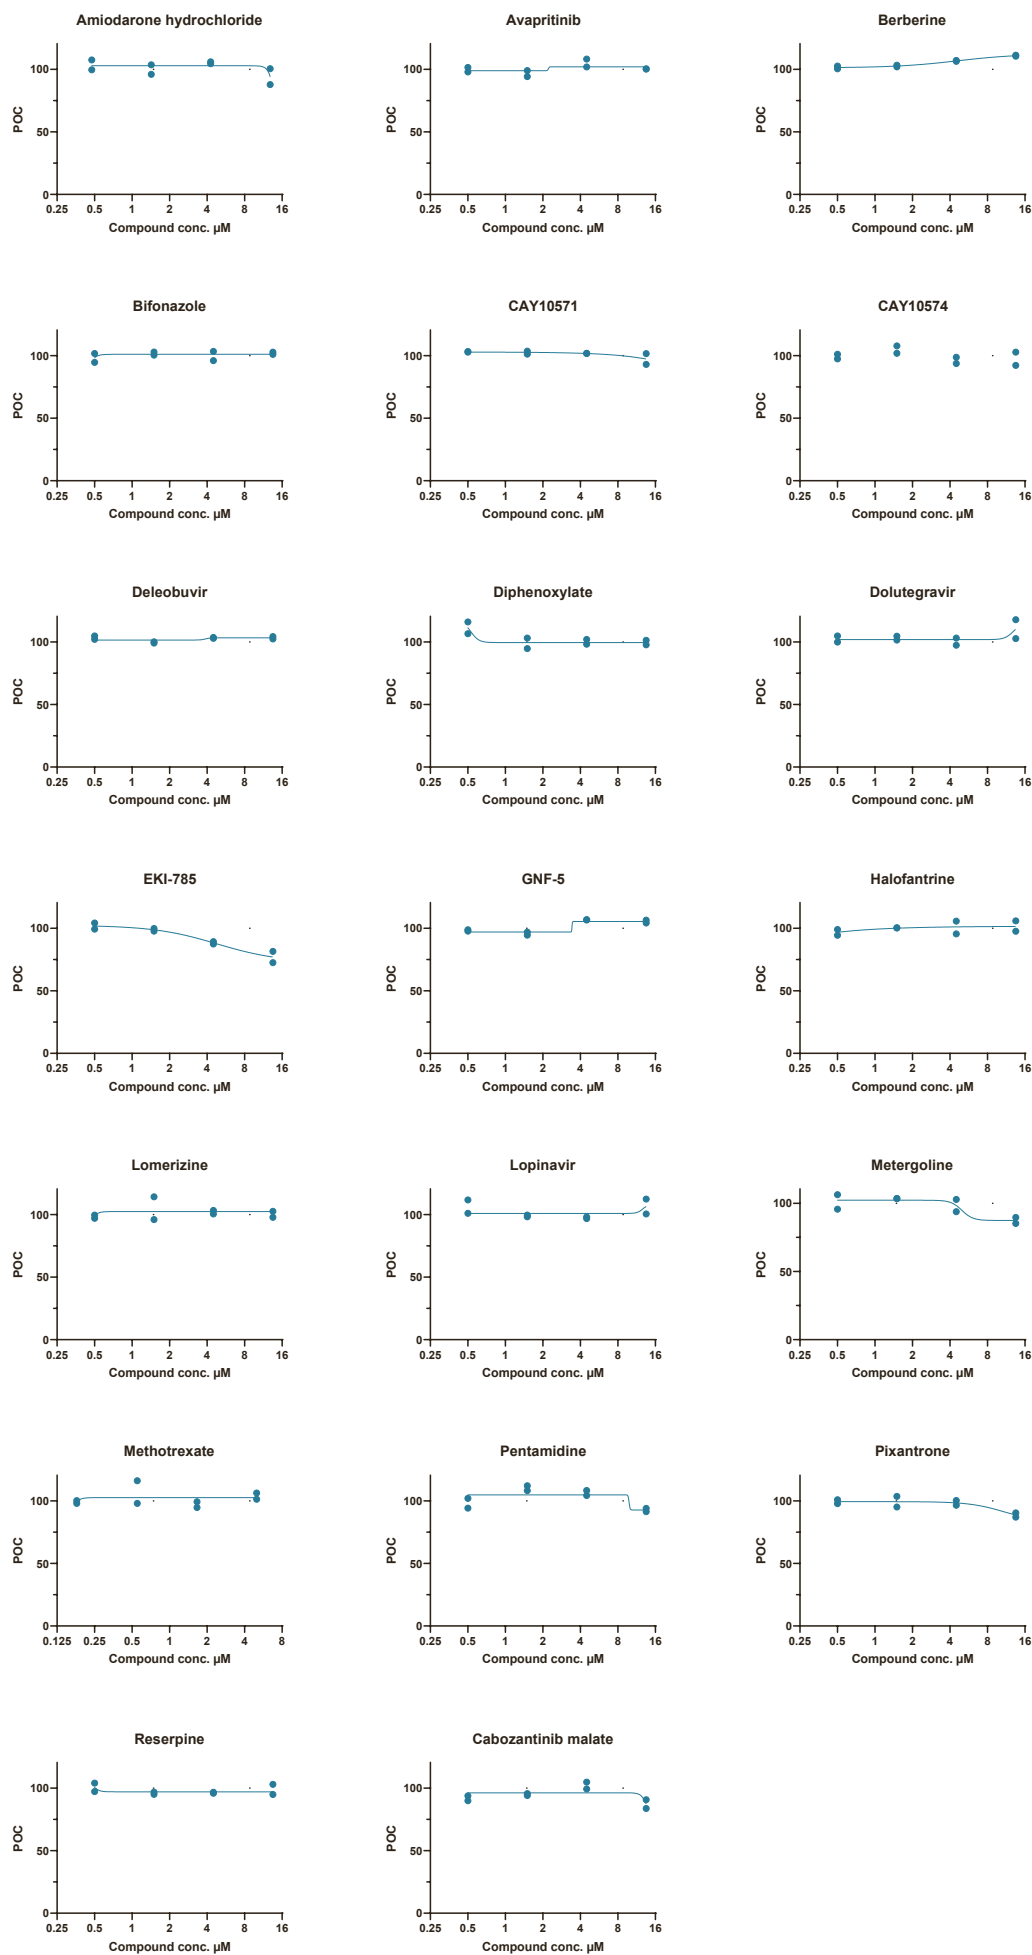

**Figure S1: Cytotoxicity assay with CellTiter-Glo - related to Figure 2.** HeLa cells were treated with compounds in 3-fold serial dilutions starting at 13.5 μM for 48 h to assess their cytotoxicity in the absence of Ct in duplicates. Cell viability was determined by measuring metabolic activity in each well using CellTiter-Glo. Percentage of control (POC) calculation was based on 0.1% DMSO-treated cells (100% viability anticipated).

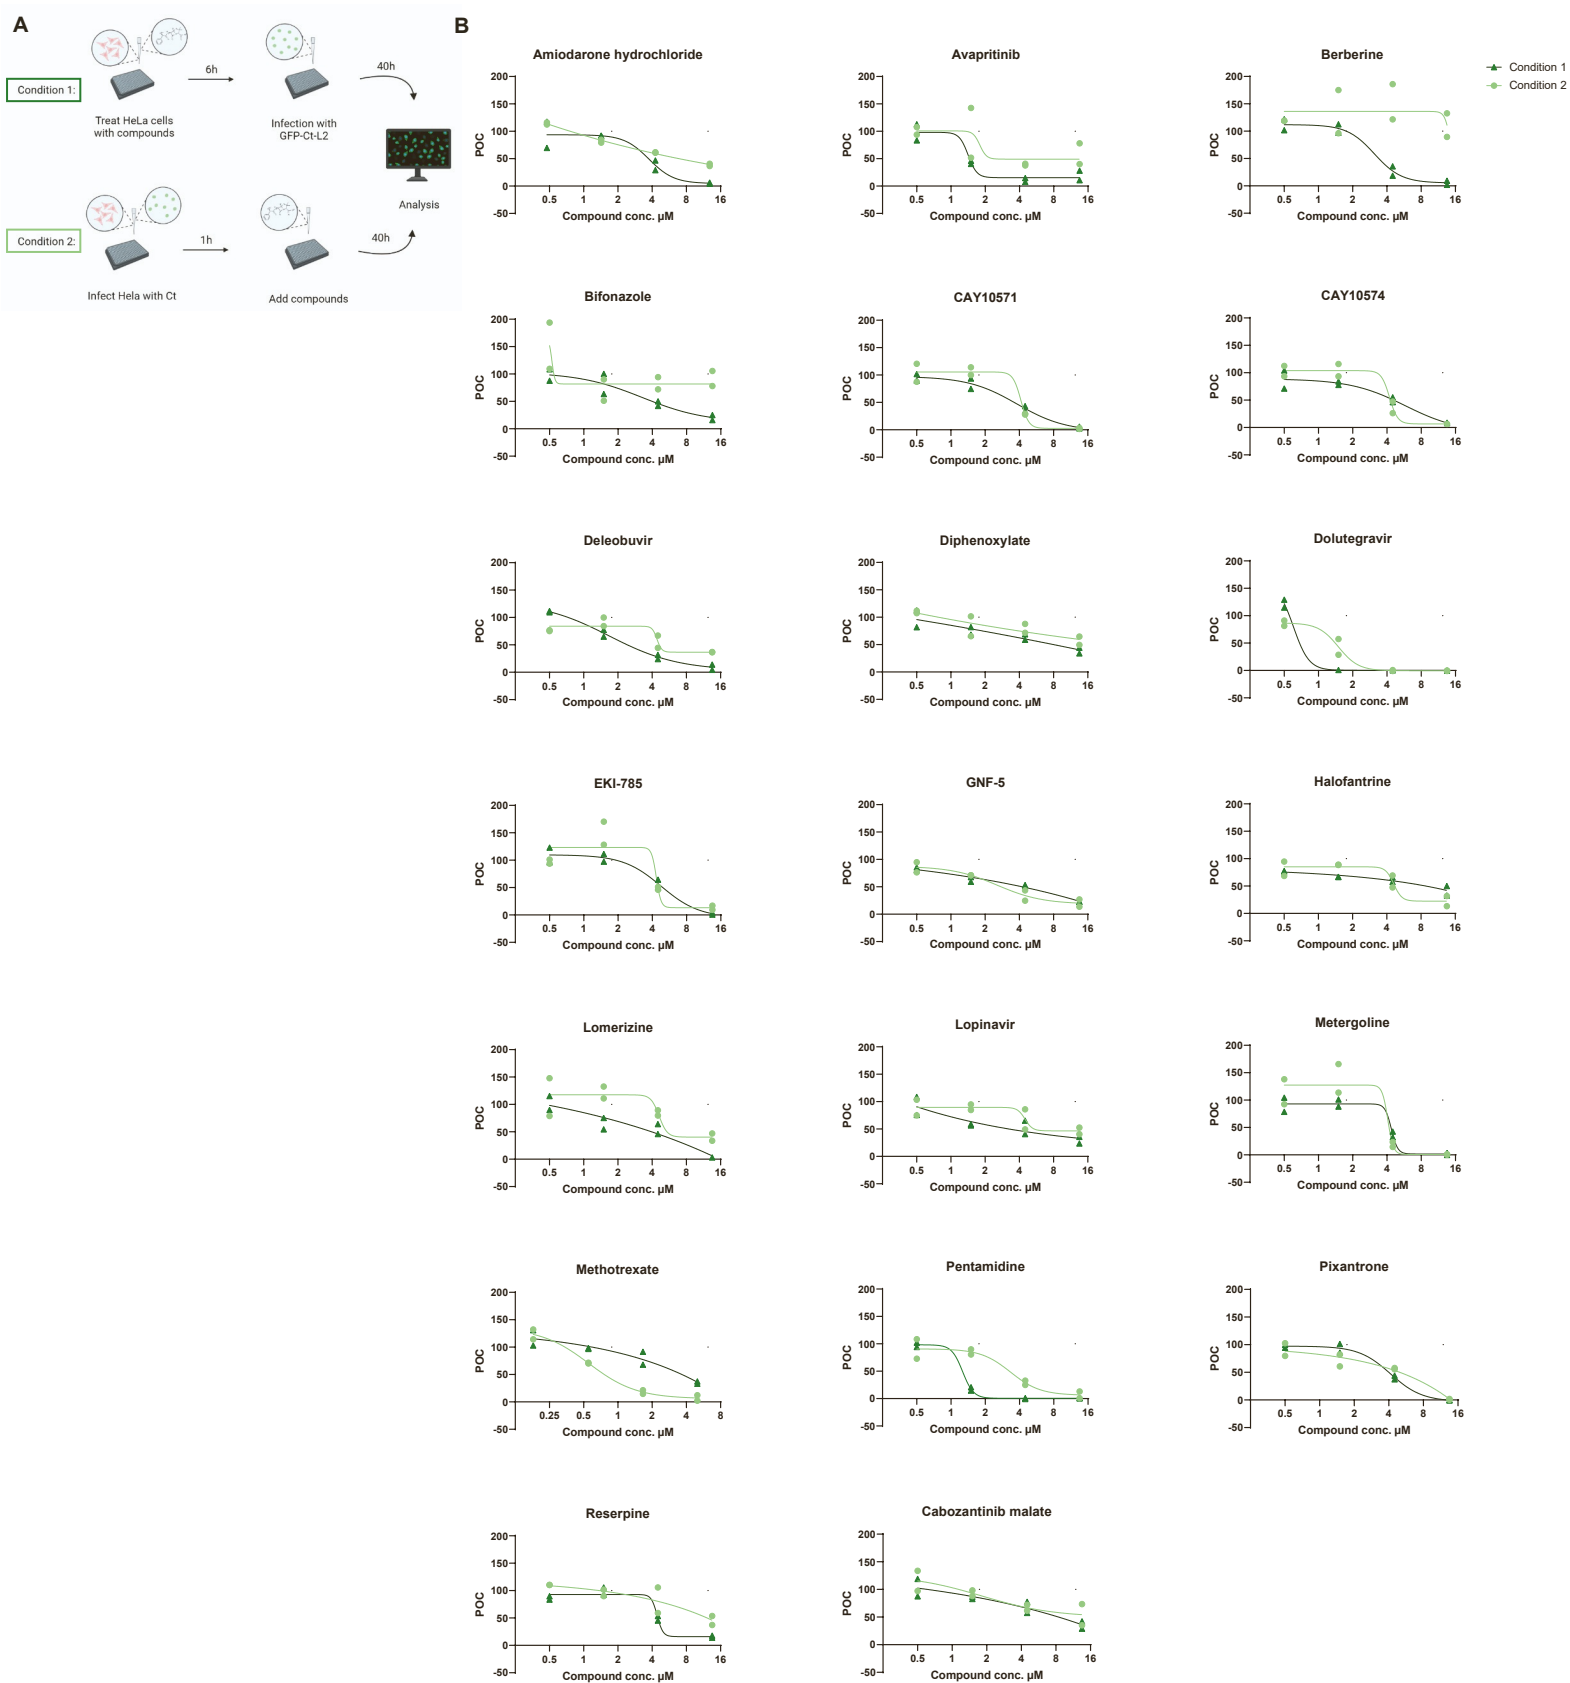

**Figure S2: Addition of compounds before or after Ct infection - related to Figure 2.** To assess the effect of compounds if applied after infection, the top 20 compounds were added in 3-fold serial dilutions starting at 13.5  $\mu\text{M}$  to HeLa cells 1 h after infection with Ct-L2-GFP. The cells were incubated for 42 h and POC was compared with results from the previous dose-response validation screen with compounds being present already before Ct infection. A) Scheme of experimental setup. Created with BioRender. B) Dose response curves in technical duplicates.

A

|                                                                      | N                   | Infections per year including reinfections during follow-up | 95%-CI        |
|----------------------------------------------------------------------|---------------------|-------------------------------------------------------------|---------------|
| Overall episodes of Ct infection                                     | 847                 | 127.05                                                      | 120.24-134.05 |
| HIV negative individuals Episodes of Ct infection                    | 436                 | 60.01                                                       | 60.01-71.15   |
| HIV positive individuals Episodes of Ct infection                    | 411                 | 61.65                                                       | 56.39-67.28   |
| HIV positive individuals with DTG Episodes of Ct infection 42.57%    | 175                 | 26.25                                                       | 22.72-30.24   |
|                                                                      | <u>Standardized</u> | 30.83                                                       |               |
| HIV positive individuals without DTG Episodes of Ct infection 57.42% | 236                 | 35.55                                                       | 56.39-67.28   |
|                                                                      | <u>Standardized</u> | 30.96                                                       |               |

B

| HIV+ with serovar analysis available |       |                  | DTG   |       | Total frequency of serovar in our cohort |
|--------------------------------------|-------|------------------|-------|-------|------------------------------------------|
|                                      |       |                  | No    | yes   |                                          |
| Serovar                              | E     | Count            | 26    | 23    | 49                                       |
|                                      |       | % within serovar | 53.1% | 46.9% | 24,7%                                    |
|                                      | F     | Count            | 4     | 3     | 7                                        |
|                                      |       | % within serovar | 57.1% | 42.9% | 3,5%                                     |
|                                      | G     | Count            | 28    | 22    | 50                                       |
|                                      |       | % within serovar | 56%   | 44%   | 25,3%                                    |
|                                      | J     | Count            | 11    | 15    | 26                                       |
|                                      |       | % within serovar | 42.3% | 57.7% | 13,1%                                    |
|                                      | K     | Count            | 0     | 1     | 1                                        |
|                                      |       | % within serovar | 0%    | 100%  | 0,5%                                     |
|                                      | L1-L3 | Count            | 32    | 33    | 65                                       |
|                                      |       | % within serovar | 49.2% | 50.8% | 32,8%                                    |
| Total                                |       |                  |       |       | 198                                      |
|                                      |       |                  |       |       | 100%                                     |

C

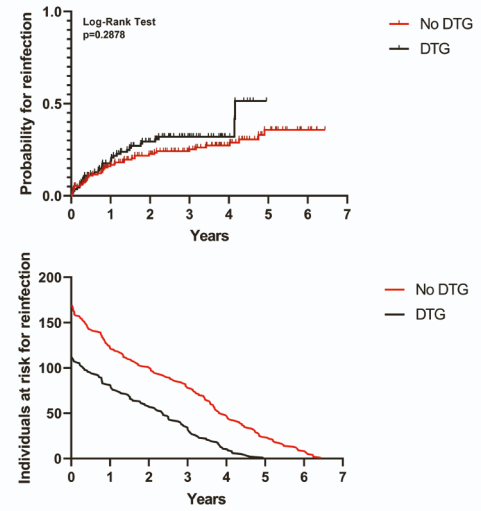

**Figure S3: Chlamydia incidence in HIV+ and HIV- patients with and without dolutegravir (DTG) treatment - related to Figure 3.** A) Table shows the chlamydia infections per year in HIV negative and positive men. HIV positive patients with and without DTG treatment were assessed separately. B) Ct serovar typing of HIV+ patients with and without DTG treatment. (Fishers Exact test:  $p=0.815$ ) C) Kaplan-Meier curves for the probability for Ct infection (upper chart) and the individual risk for Ct infection (lower chart) are presented.

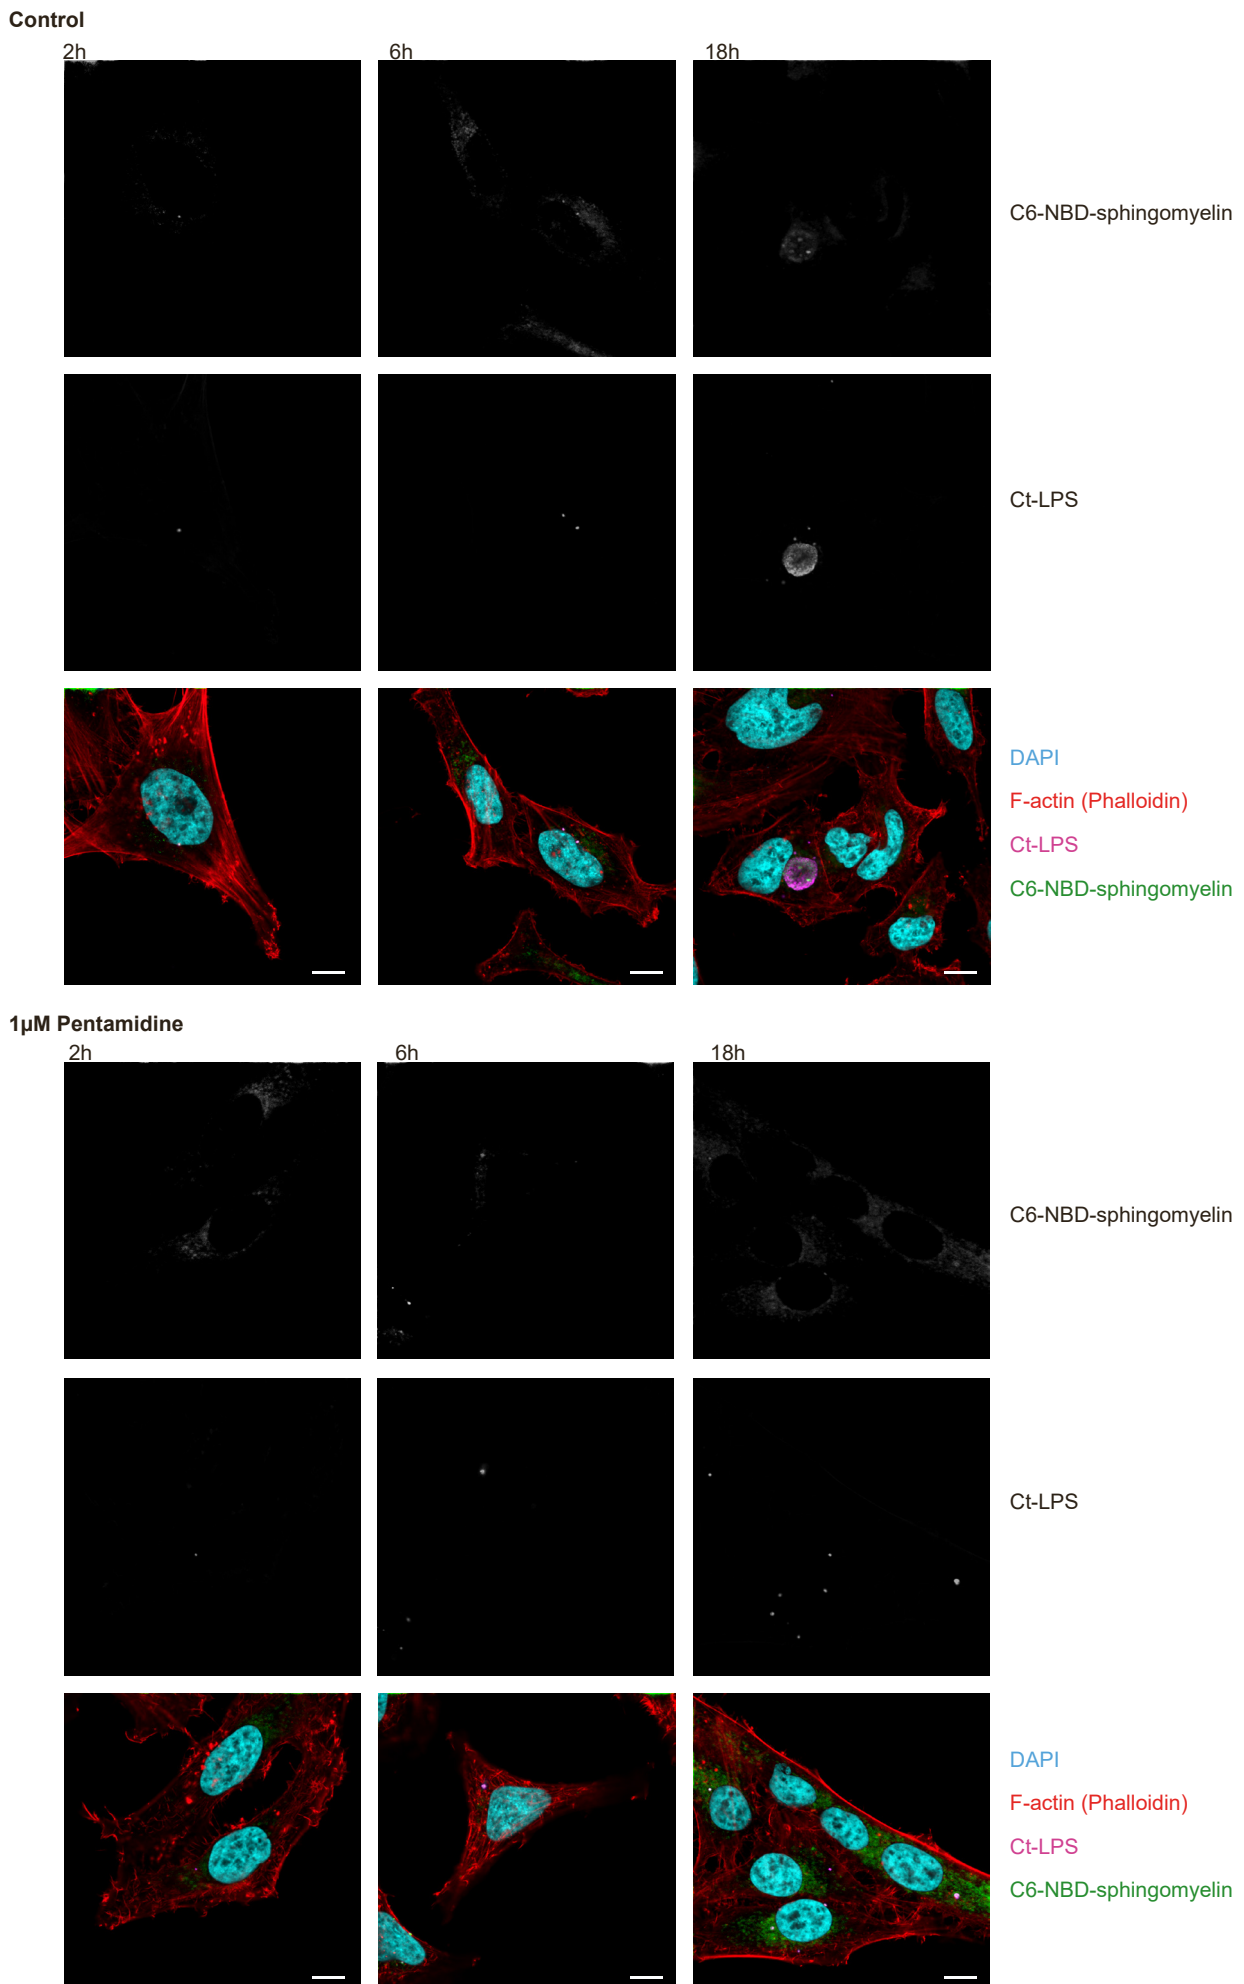

**Figure S4: C6-NBD-sphingomyelin is recruited to inclusions in pentamidine treated cells, but inclusions do not develop further - related to Figure 4.** HeLa cells were treated with 1  $\mu$ M pent or DMSO (Control) for 6 h before infection with Ct-L2 MOI 2.5 (no GFP-expressing). 2 h, 6 h or 18 h after infection, cells were harvested and stained with C6-NBD-Ceramide, anti-Ct-LPS, phalloidin and DAPI. Representative images are shown. Scale bar = 10 $\mu$ m.

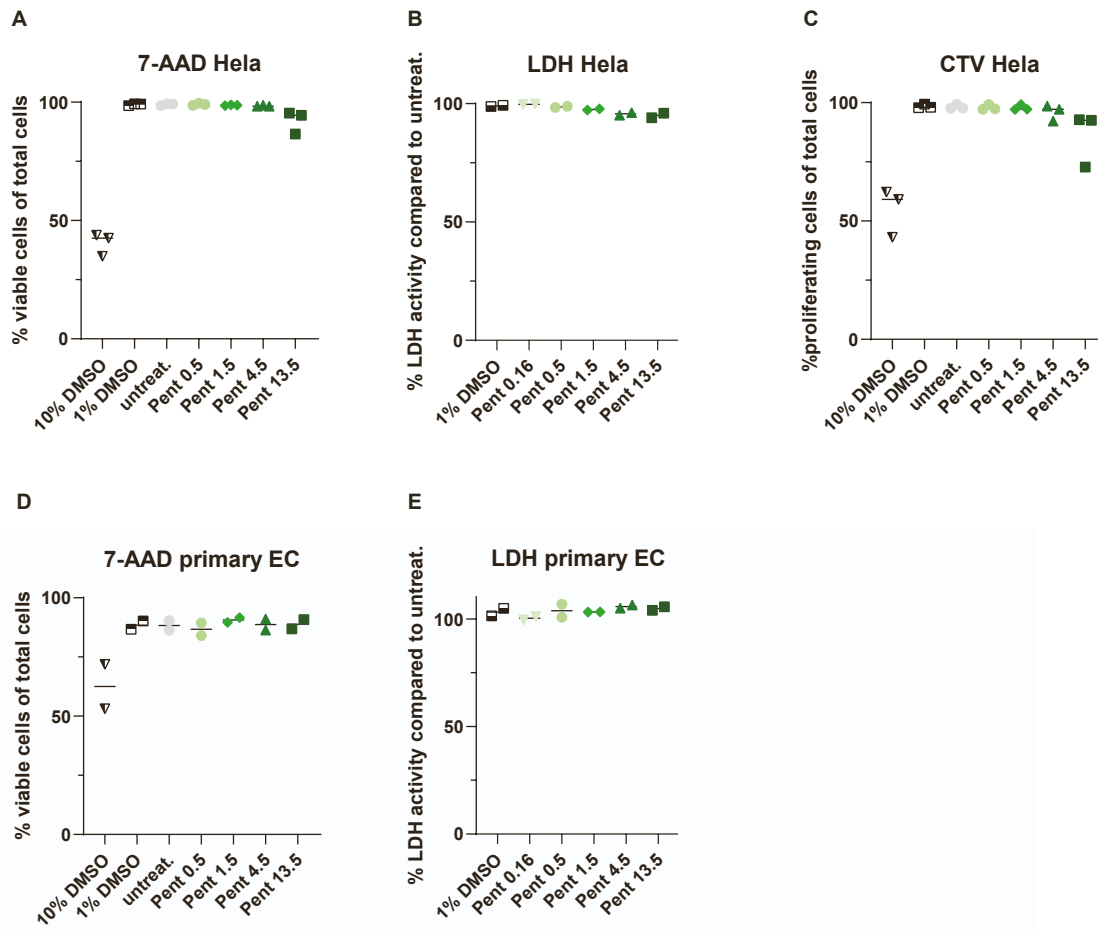

**Figure S5: Viability of HeLa cells and primary EC is not impacted by pentamidine - related to Figure 4.** A-C) HeLa cells were treated with various concentrations of pentamidine (13.5  $\mu\text{M}$  – 0.16  $\mu\text{M}$ ) and DMSO for 48 h. A) Flow-cytometric analysis of 7-AAD negative cells, 3 independent experiments. B) Analysis of LDH-activity in pentamidine treated samples in comparison to untreated cells, 2 independent experiments. C) Flow-cytometric analysis of proliferating cells by assessing dilution of CellTrace Violet (CTV), 3 independent experiments. D-E) primary cervical epithelial cells were treated with various concentrations of pentamidine and DMSO for 48 h. D) Flow-cytometric analysis of 7-AAD negative cells, 2 independent experiments. E) Analysis of LDH-activity in pentamidine treated samples in comparison to untreated cells, 2 independent experiments.

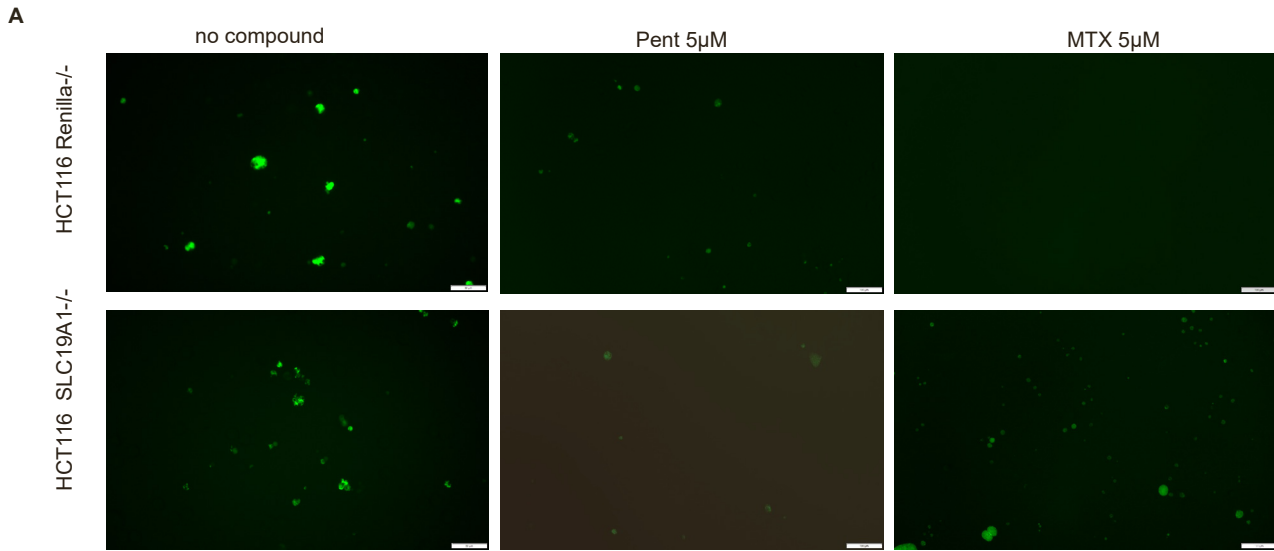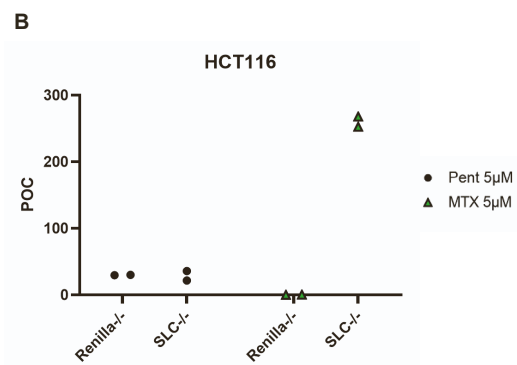

**Figure S6: Pentamidine, in contrast to methotrexate, does not inhibit Ct growth via SLC19A1 - related to Figure 4.** HCT116 Renilla<sup>-/-</sup> and SLC19A1<sup>-/-</sup> (SLC) cells treated with 5 $\mu$ M pentamidine (Pent) or 5  $\mu$ M methotrexate (MTX) 6 h before infection were analyzed 48 h after infection. A) Representative images, scale bar = 100  $\mu$ m. B) Percentage of control (n=2 independent experiments).
