# Supplementary material for: Combination of compound screening with an animal model identifies pentamidine to prevent Chlamydia trachomatis infection
Source: PubMed Central journal article supplement — Cell Rep Med. 2024 Jul 8;5(7):101643. doi: 10.1016/j.xcrm.2024.101643 (PMC11293347; doi:10.1016/j.xcrm.2024.101643), 2024-07-08
Supplement: mmc6.pdf [file mmc6.pdf]

# Combination of compound screening with an animal model identifies pentamidine to prevent *Chlamydia trachomatis* infection

## Graphical abstract

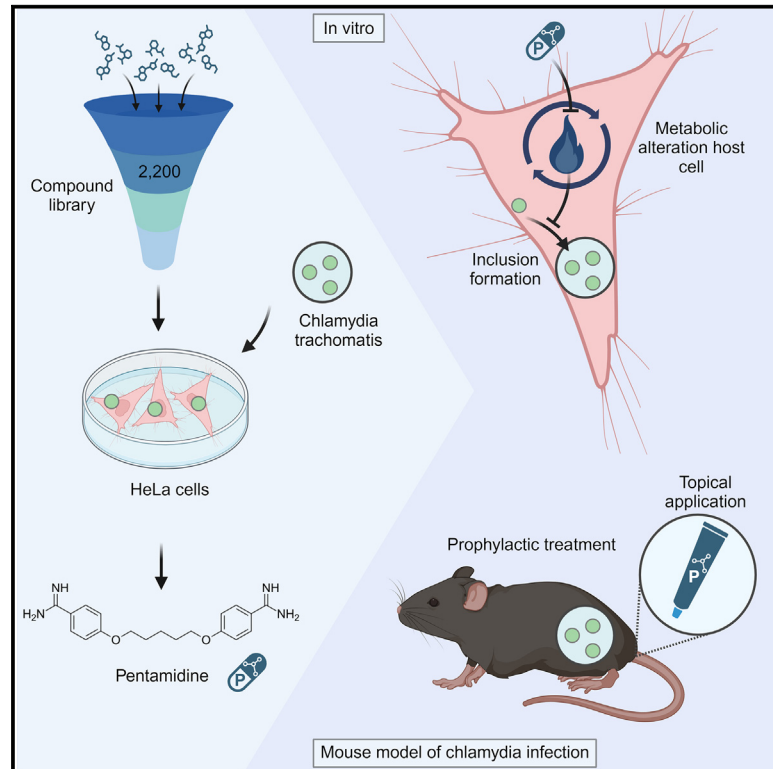

## Authors

Katja Knapp, Romana Klasinc, Anna Koren, ..., Stefan Kubicek, Hannes Stockinger, Georg Stary

## Correspondence

georg.stary@meduniwien.ac.at

## In brief

As the numbers of sexually transmitted infections are rising, innovative prophylactic measures are needed. Knapp et al. performed a medium-throughput compound screen to identify new drugs inhibiting *Chlamydia trachomatis* growth in cell lines. The top hits were tested in a *Chlamydia trachomatis* mouse model for their ability to prevent infection.

## Highlights

- A compound screen identifies 28 non-antibiotics inhibiting *Chlamydia trachomatis*
- Pentamidine inhibits chlamydia replication indirectly via the host cells
- Systemic and intrauterine pentamidine treatment decreases chlamydia burden in mice
- Pentamidine is a promising candidate for prophylaxis against bacterial STIs

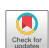

## Article

# Combination of compound screening with an animal model identifies pentamidine to prevent *Chlamydia trachomatis* infection

Katja Knapp,<sup>1,2,5</sup> Romana Klasinc,<sup>3,5</sup> Anna Koren,<sup>2</sup> Magdalena Siller,<sup>2,3</sup> Ruth Dingelmaier-Hovorka,<sup>1</sup> Mathias Drach,<sup>1</sup> Juan Sanchez,<sup>2</sup> David Chromy,<sup>1</sup> Marlene Kranawetter,<sup>4</sup> Christoph Grimm,<sup>4</sup> Andreas Bergthaler,<sup>2,3</sup> Stefan Kubicek,<sup>2</sup> Hannes Stockinger,<sup>3</sup> and Georg Stary<sup>1,2,6,\*</sup>

<sup>1</sup>Department of Dermatology, Medical University of Vienna, Vienna 1090, Austria

<sup>2</sup>CeMM Research Center for Molecular Medicine of the Austrian Academy of Sciences, Vienna 1090, Austria

<sup>3</sup>Institute for Hygiene and Applied Immunology, Center for Pathophysiology, Infectiology and Immunology, Medical University of Vienna, Vienna 1090, Austria

<sup>4</sup>Department of Obstetrics and Gynecology, Medical University of Vienna, Vienna 1090, Austria

<sup>5</sup>These authors contributed equally

<sup>6</sup>Lead contact

\*Correspondence: [georg.stary@meduniwien.ac.at](mailto:georg.stary@meduniwien.ac.at)

<https://doi.org/10.1016/j.xcrm.2024.101643>

## SUMMARY

*Chlamydia trachomatis* (Ct) is the most common cause for bacterial sexually transmitted infections (STIs) worldwide with a tremendous impact on public health. With the aim to unravel novel targets of the chlamydia life cycle, we screen a compound library and identify 28 agents to significantly reduce Ct growth. The known anti-infective agent pentamidine—one of the top candidates of the screen—shows anti-chlamydia activity in low concentrations by changing the metabolism of host cells impairing chlamydia growth. Furthermore, it effectively decreases the Ct burden upon local or systemic application in mice. Pentamidine also inhibits the growth of *Neisseria gonorrhoea* (Ng), which is a common co-infection of Ct. The conducted compound screen is powerful in exploring antimicrobial compounds against Ct in a medium-throughput format. Following thorough *in vitro* and *in vivo* assessments, pentamidine emerges as a promising agent for topical prophylaxis or treatment against Ct and possibly other bacterial STIs.

## INTRODUCTION

The risk of death or serious health restraints from infectious diseases has decreased in developed countries based on the availability of efficient antimicrobial measures, including prophylaxis and treatment.<sup>1,2</sup> However, many sexually transmitted infections (STIs) are currently increasing in North America and Europe,<sup>3,4</sup> especially among individuals engaging in high-risk sex practices, including unprotected sex with multiple partners.<sup>5</sup> This trend was even intensified by the COVID-19 pandemic due to reduced screening and access to health care facilities.<sup>6,7</sup>

The most common bacterial STIs are *Chlamydia trachomatis* (Ct) infections with an estimated prevalence of around 4% in the Americas and around 2% in Europe with highest infection rates in the population between 15 and 24 years.<sup>8,9</sup> There are different Ct serovars characterized by their major outer membrane proteins: serovars A–C primarily cause ocular infection, while serovars D–K preferentially infect the urogenital tract, and serovars L1–L3 can lead to lymphogranuloma venereum.<sup>10</sup> Ct is an intracellular pathogen utilizing the host cell machinery for replication.<sup>11</sup> Briefly, Ct elementary bodies (EBs) can interact with various surface receptors on epithelial cells, which facilitate

the uptake of the pathogen.<sup>11</sup> Using cell cytoskeletal proteins, EBs form an inclusion within the endocytic vacuoles where they replicate in the form of reticulate bodies (RBs) utilizing nutrients provided by the host cell. After finishing their replication cycle, RBs transform back into EBs and leave the cell by cell lysis or extrusion.<sup>11,12</sup> Since the Ct developmental cycle is strictly dependent on the host cell, treatment approaches do not need to solely rely on antibiotics inhibiting, e.g., bacterial protein synthesis but may also consider alternative mechanisms by interfering with cell entry or modulating host cell structures.<sup>13</sup> Alternative strategies involve, among others, inhibiting type III secretion systems of Ct, blocking chlamydial attachment by destroying the bacterial membrane or binding certain membrane structures, and enhancing host cell defense mechanisms by cytokines or blocking of metabolic processes utilized by *Chlamydia* spp.<sup>13,14</sup> Even though human chlamydial infections are well treatable with antibiotics, there are studies reporting tetracycline resistance by the presence of a Tet(C)-island in the genome in the species-specific strain *Chlamydia suis* infecting pigs.<sup>13,15</sup>

Another STI of concern with high rates of antibiotic resistance is *Neisseria gonorrhoea* (Ng). A large portion of clinical Ng isolates are resistant to early developed antibiotics like penicillin,

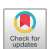

sulfonamides, and tetracyclines, and additional resistance to extended-spectrum cephalosporins and macrolides, which are currently recommended for treatment, is on the rise.<sup>16,17</sup> Moreover, co-infections of *Ng* with various STIs are common,<sup>18</sup> as there exists an increased susceptibility of already infected individuals to other STIs.<sup>19,20</sup> A significant problem with both *Ct* and *Ng* infections is posed by the high rates of asymptomatic cases that can still cause severe long-term sequelae in females like pelvic inflammatory disease resulting in infertility or ectopic pregnancy.<sup>21</sup>

Preventive measurements include screening programs for individuals at high risk. Nevertheless, screening is expensive for the health care system, and a cost-effectiveness assessment is often not available.<sup>22,23</sup> The ultimate goal would be to develop a vaccine as preventive measure, which was not successful so far despite 60 years of research with only one vaccine candidate currently being in a clinical trial.<sup>24–27</sup> Other preventive strategies involve pre- and post-exposure prophylaxis (PrEP/PEP) with doxycycline (doxy) in patient groups with high-risk behavior for the acquisition of chlamydial infections and syphilis that are frequently using human immunodeficiency virus (HIV)-PrEP.<sup>28–30</sup> However, the concern of antimicrobial resistance of *Ng* and also other sexually transmitted pathogens as well as commensals greatly limits the doxy-PEP. In a recent study from Luetkemeyer et al., the development of resistance in *Ng* and *Staphylococcus aureus* isolates was increased in the doxy-PEP group.<sup>30</sup> Therefore, alternatives to doxy to prevent and treat STIs are of growing importance.

In this project, we report a systematic screen for molecules that reduce *Ct* growth *in vitro*. We identified pentamidine as a candidate compound that was also effective in reducing *Ct* burden (by topical or systemic treatment) in an *in vivo* mouse model of genital *Ct* infection. In addition, we demonstrated that already low concentrations modulate the host metabolism and inhibit the growth of *Ct* and *Ng*, making it an ideal agent for PrEP or PEP of STIs.

## RESULTS

### Identification of reagents inhibiting chlamydia growth in a medium-throughput compound screen

To identify novel classes of pharmacological agents inhibiting chlamydia growth, we chose a library of ~2,200 compounds, which include approved drugs and well-described experimental molecules. As *Ct*-infected cells are not dividing, we defined the optimal ratio of 2,000 HeLa cells per 384-well infected with *Ct*-L2-GFP at a multiplicity of infection (MOI) of 2.5 (Figures 1A and 1B). To determine the number of nuclei and inclusions in each condition, we fixed the cells with 4% paraformaldehyde/1% methanol, which allowed for the detection of the endogenous GFP signal of *Ct* inclusions and nuclear staining with DAPI and cell staining with Evans blue for HeLa cells (Figure 1C). A decrease in the number of cell nuclei per field of view to less than 100 was considered as cytotoxic effect of a given compound and excluded from analysis (Figure 1D). To test the efficiency of the screening compounds to reduce *Ct* growth, we set the cutoff to 50% in relation to the negative control (DMSO) (percentage of control, POC < 50) and the positive control (azithromycin 50 nM) (Figure 1E). In the initial screening approach,

we identified 88 compounds having the potential to control chlamydia infection. We only identified 26 compounds that are known antibiotics. These compounds were excluded from subsequent analysis as the aim was to identify novel inhibitors. The screen revealed the following main substance classes as effective: (1) antineoplastics, (2) antivirals, and (3) psychoactive drugs (Figure 1F; Table S1). In a validation experiment, dose responses of the remaining 62 reagents in 3-fold dilutions revealed 28 reagents that showed a reduction of chlamydia growth by more than 40% (POC < 60) in two or more concentrations (Figure 2A; Table S2). These 28 compounds were further evaluated in various conditions to select the most effective candidates for chlamydia inhibition.

### Validation reveals candidate drugs being effective against different genital chlamydia serovars

*Ct*-L2 causing lymphogranuloma venereum is more invasive and grows faster *in vitro* than genital serovars *Ct*-E and *Ct*-F.<sup>31</sup> Therefore, we investigated if the compounds validated from the primary screen are reactive against different genital *Ct* serovars in various concentrations (Figure 2A; Table S3). The most efficient compounds identified are avapritinib, CAY10571, CAY10574, dolutegravir, EKI-785, metergoline, methotrexate, pentamidine, and pixantrone. Most drug candidates showed a similar trend in all three *Ct* serovars (Figure 2B). By using the CellTiter-Glo, we demonstrated that compounds used in the validation screen are well tolerated by the cells as viability was above 90% for all compounds (Figure S1). In addition to the experimental layout with the compound treatment before *Ct* infection (Figure 1A), we assessed the effectivity of drugs if added 1 h after infection (Figure S2; Table S4). This time point of infection was chosen to identify drugs that have an effect during early chlamydia life cycle. We observed a slight decrease for dolutegravir and pentamidine if compounds are added after infection (Figure S2). This suggests that those compounds might play a role during early events in chlamydia replication or might take some time until they are fully active within the cells. We selected pentamidine, dolutegravir, and metergoline to test in a mouse model for genital chlamydia infection as (1) these compounds significantly block *Ct* growth in various conditions, (2) their targets in the chlamydia life cycle have not yet been described, and (3) they are approved drugs that allow for easier translation to patients (Figure 2C).

### Pentamidine is effective in a mouse model for genital chlamydia infection

To investigate if the compounds inhibiting *Ct* growth in HeLa cells also work *in vivo* during female genital tract infection, we established a mouse model of *Ct* infection for prophylactic compound treatment. Mice received drug doses every 24 h starting 1 day before infection, resembling continuous schemata for pre-exposure prophylaxis.<sup>29</sup> At the peak of chlamydia burden 4 days after genital *Ct* infection,<sup>32</sup> uteri were harvested to quantify chlamydia burden (Figure 3A). Mice receiving a combination of systemic and local treatment with doxy or pentamidine had a significantly lower chlamydia burden compared with DMSO-treated mice (Figure 3B). Treatment with either dolutegravir or metergoline did not protect mice from chlamydia replication within their uteri (Figure 3B).

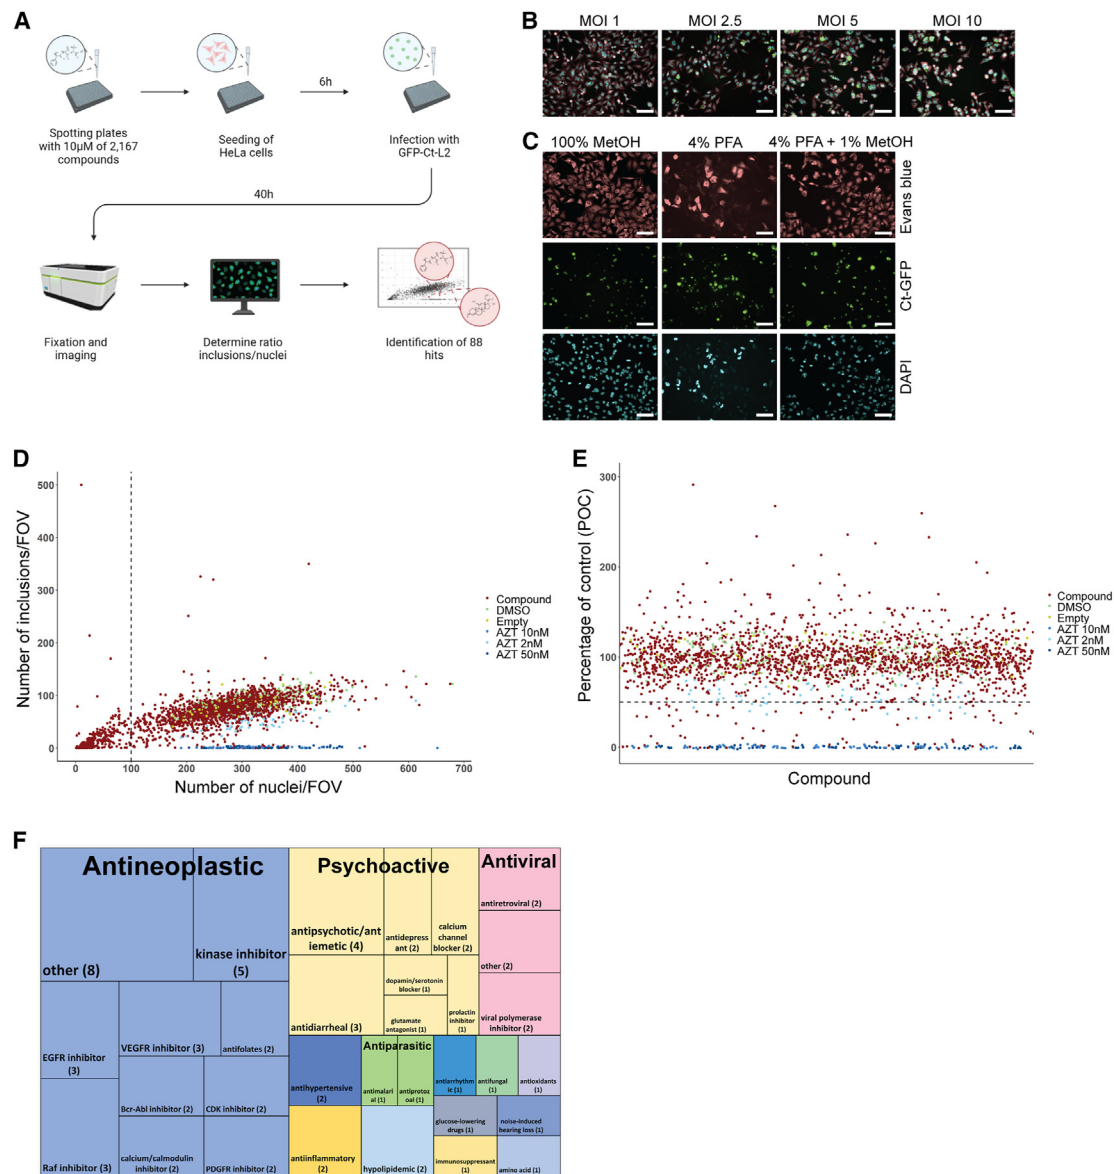

**Figure 1. Medium-throughput screen reveals compounds inhibiting chlamydia growth**

- (A) Schematic of the experimental setup of the medium-throughput screen. HeLa cells were seeded in 384-well plates containing 10  $\mu$ M of compounds. Ct-containing media were added after 6 h on top. Plates were incubated for 40 h.
- (B and C) Overview of test conditions.
- (B) Overlay of fluorescent images of DAPI (blue), Evans blue (red), and Ct inclusions (green) infected with different MOI (PerkinElmer Operetta high-content automated confocal microscope, 20 $\times$  long field WD); representative images; scale bars, 100  $\mu$ m.
- (C) One representative field of view (FOV) per well is depicted after fixation with either 100% methanol (MetOH), 4% paraformaldehyde (PFA), or 4% PFA containing 1% methanol.
- (D) Plot showing number of nuclei vs. number of inclusions of initial screen. Each dot represents one test compound (Cpd). DMSO-treated wells as negative controls (DMSO), empty wells (Empty), and azithromycin-treated wells as positive controls (AZT 10 nM, AZT 2 nM, AZT 50 nM). The cutoff for cytotoxic drugs was 100 nuclei per FOV.
- (E) Percentage of control vs. compound ID for compounds being not cytotoxic. Hits are compounds that reduce chlamydia growth to less than 50% of control.
- (F) Tree map plot of the drug classes and subclasses identified to inhibit Ct growth.

Next, we explored the effect of local application of pentamidine in the mouse model for genital Ct infection starting 1 day prior infection. Local pentamidine treatment significantly reduces the chlamydia burden in mice (Figure 3C). In comparison

to the systemic pentamidine treatment where all mice presented with bradykinesia, we did not observe these therapy-related adverse events in mice with the local treatment regime. Histopathological assessment of uteri of locally treated mice revealed

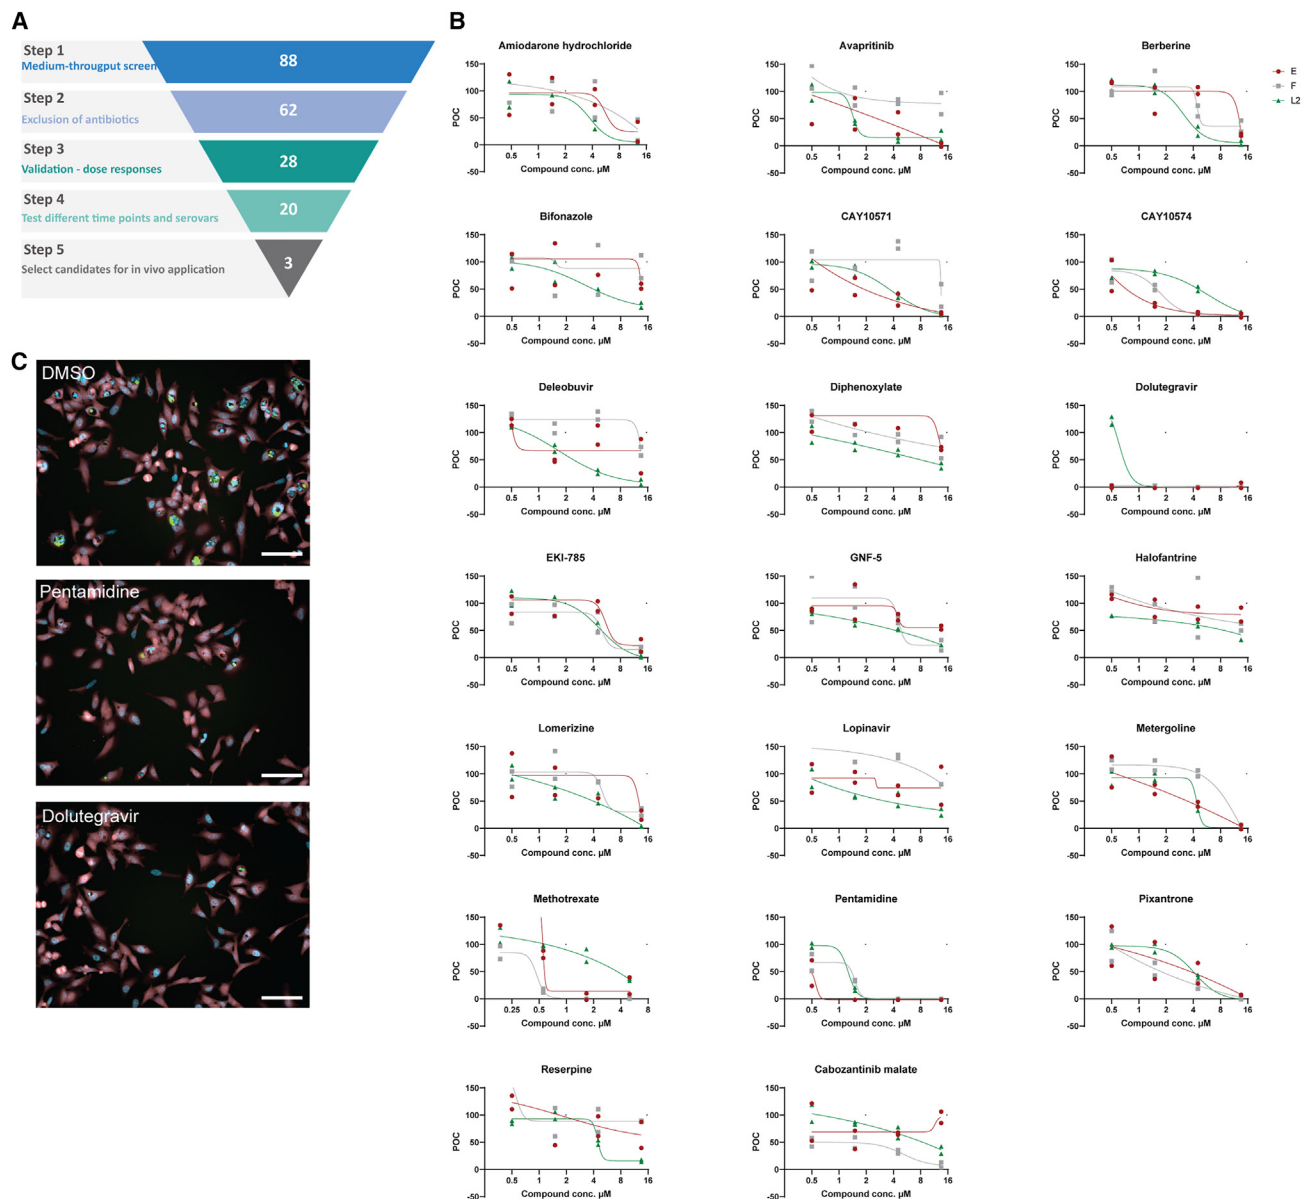

**Figure 2. Validation experiments reveal inhibition of *Ct* growth across various serovars**

(A) Schematic of the compound sets used in this study and the sequential screening steps applied to obtain a selection of a final set of 3 drugs for *in vivo* experiments.

(B) Dose-response curves for the 20 compounds remaining after the validation conditions. 3-fold dilutions in technical duplicates starting from 13.5  $\mu\text{M}$  for *Ct* serovars E, F, and L2 were assessed. POC, percentage of DMSO-treated control.

(C) Representative images of indicated compounds in 13.5  $\mu\text{M}$  concentration (PerkinElmer Operetta high-content automated confocal microscope, 20 $\times$  long field WD); scale bars, 100  $\mu\text{m}$ .

similar grading of inflammation between pentamidine-treated and -untreated *Ct*-infected mice (Figure 3D). Additionally, three mice received only one local dose of pentamidine to assess pathology (Figure 3D) and absorption (Figure 3E) of pentamidine upon transcervical drug inoculation. Singular drug doses do not cause any pathological changes in the uterus, liver, or kidney of these mice, and the highest drug levels could be detected within the uterus (Figure 3E). Therefore, pentamidine represents

an interesting compound for prophylaxis against *Ct* infection in a mouse model, having potential as a local microbicide preventing human *Ct* infection.

#### Lack of effectiveness of dolutegravir against *Ct* infection in people with HIV

For dolutegravir, we analyzed a cohort of people living with HIV receiving dolutegravir as part of their antiretroviral therapy.

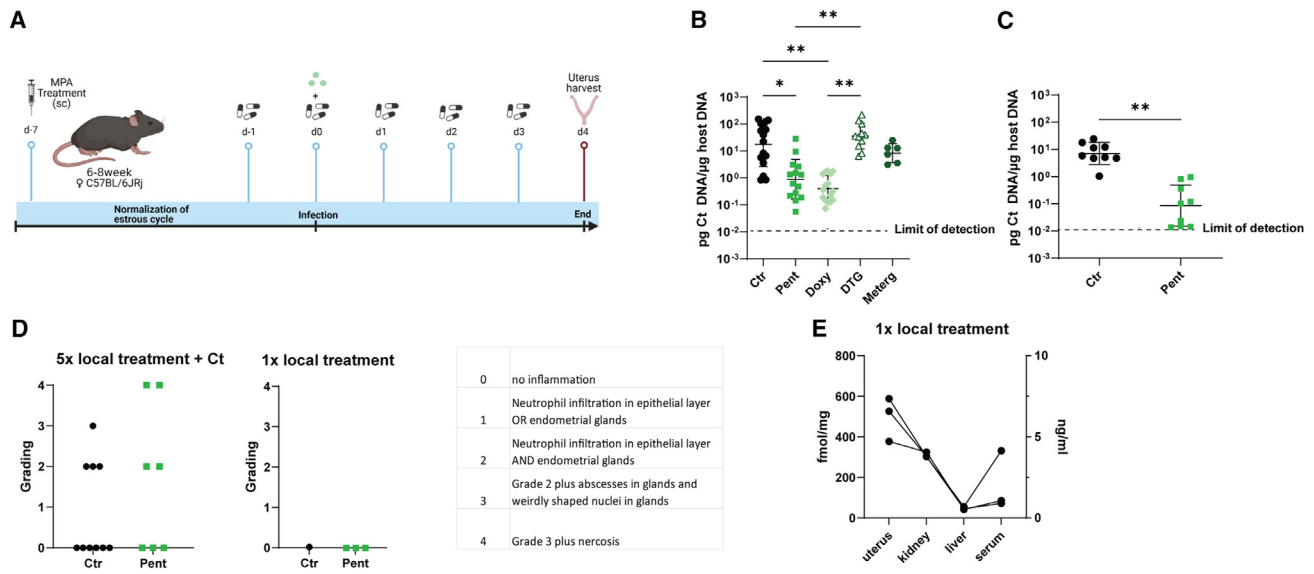

**Figure 3. Pentamidine prevents *Ct* infection *in vivo***

(A) Schematic of setup of animal experiments. Created with BioRender.

(B) Bacterial burden in mouse uteri at the end of experiment in different groups under systemic plus local treatment: mock-treated mice (Ctr), pentamidine (Pent), doxy, dolutegravir (DTG), or metergoline (Meterg)-treated mice. Bacterial burden is indicated as pg *Ct* DNA per  $\mu\text{g}$  host DNA. One-way ANOVA and Tukey's multiple comparisons tests were performed to find differences between treatment groups ( $*p < 0.05$ ,  $**p < 0.01$ ). Data are presented as the mean of biological replicates  $\pm$  SD.

(C) Bacterial burden in mouse uteri after local Pent or mock (Ctr) treatment was analyzed by unpaired t test ( $**p < 0.01$ ). Data are presented as the mean of biological replicates  $\pm$  SD.

(D) Histopathological grading of uteri. Uteri from mice receiving 5 $\times$  local treatment and *Ct* infection (same mice as shown in C,  $n = 7$ –10) and mice treated once locally ( $n = 3$ ) were stained with H&E and assessed by a pathologist 24 h after last treatment.

(E) Pentamidine absorption 24 h after 1 $\times$  local treatment in different organs (fmol/mg) and serum (ng/ $\mu\text{L}$ ).

Individuals receiving dolutegravir are as likely to acquire a *Ct* infection as patients without dolutegravir intake (Figure S3). Therefore, our results suggest that in the mouse model for genital chlamydia infection and in humans, dolutegravir does not reach inhibitory levels in tissue to prevent *Ct* infection.

### Pentamidine impairs *Ct* rapidly and permanently

The mode of action for pentamidine in protozoan infection is not well described. Pentamidine is reported as an inhibitor of (1) DNA, RNA, or protein biosynthesis<sup>33</sup> and topoisomerase,<sup>34,35</sup> (2) polyamine synthesis,<sup>36</sup> (3) folate metabolism,<sup>37,38</sup> and (4) membrane integrity.<sup>39</sup> To learn if pentamidine has a direct effect on *Ct* or an indirect effect by inhibiting host cell metabolic processes, we first tested if pentamidine acts directly on *Ct* before they enter host cells rather than acting indirectly via affecting the host cell metabolism. Upon treatment of *Ct* with different concentrations of pentamidine 30 min or 2 h before adding *Ct* to the untreated cells, we did not observe a *Ct* growth reduction in HeLa cells (Figure 4J). Next, we investigated if pentamidine interferes with *Ct* uptake or with later steps during replication. 2 h after infection, the number of bacterial particles taken up in both conditions was comparable (Figures 4A, 4B, and 4E). After 24 h, however, *Ct* inclusions only occur in control cells, whereas single *Ct* particles are present in pentamidine-treated cells (Figures 4A–4E). To determine if *Ct* particles taken up in pentamidine-treated cells are showing hallmarks of bacterial growth, we used N-[7-(4-Nitrobenzo-2-oxa-1,3-diazole)]-6-aminocaproyl-D-erythro-

sphingosine (C6-NBD-ceramide) labeling. Upon uptake in the cells, C6-NBD-ceramide is modified to sphingomyelin at the Golgi apparatus, resulting in the transfer and retention of sphingomyelin in *Ct* inclusions upon bacterial growth.<sup>40,41</sup> We performed confocal imaging of infected cells treated with C6-NBD-ceramide to assess the recruitment of C6-NBD-sphingomyelin to the inclusions. C6-NBD-sphingomyelin accumulates in the Golgi apparatus, and our findings demonstrate a clear colocalization of C6-NBD-sphingomyelin with *Ct*-lipopolysaccharide (LPS)-positive vesicles and inclusions in both controls and pentamidine-treated samples. Notably, in the pentamidine-treated cells, there was a halt in the development of the inclusions (Figure S4). This suggests that the uptake and early steps in the *Ct* life cycle are not impaired by pentamidine, but only later stages, including bacterial replication, are affected by pentamidine.

To elaborate on the function of pentamidine in *Ct* infection, we investigated the kinetics of clearance of chlamydia upon *in vitro* treatment. Therefore, HeLa cells were pre-treated with compounds in a similar setup as in our initial screen. Next, compounds were washed out 24 or 48 h after infection, respectively (Figures 4F–4I). While *Ct* persists and still proliferates in azithromycin- and doxy-treated samples if washout occurs already 24 h after infection, *Ct* growth is significantly impaired after the 24 h washout in pentamidine-treated samples (Figures 4F, 4G, and 4I). A comparable effect to pentamidine is achieved for azithromycin and doxy if they are present for at least 48 h (Figure 4H).

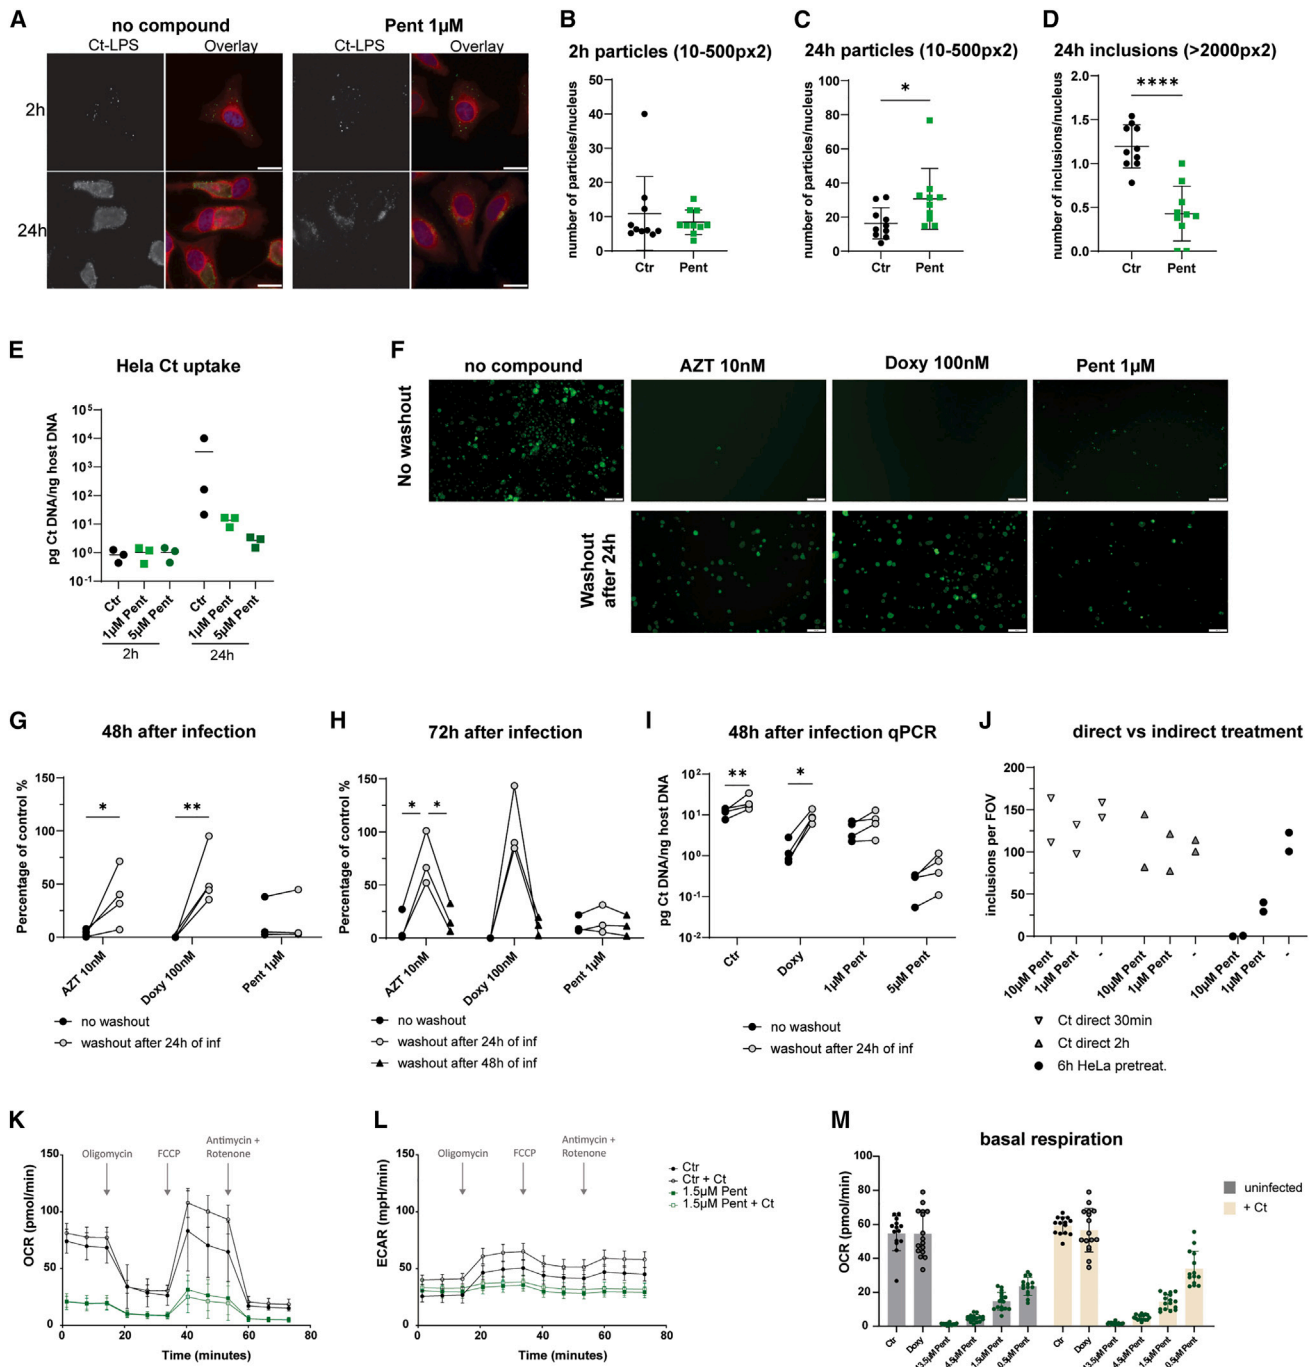

**Figure 4. Pentamidine acts more rapidly against chlamydia than antibiotics by an indirect effect via host cells**

(A–D) HeLa cells pre-treated with 1  $\mu$ M Pent for 6 h were infected with Ct-L2 (no GFP) at MOI 100. Ct uptake was quantified after washing 2 $\times$  with PBS to remove unbound Ct, PFA fixation and antibody staining for Ct-LPS in 10 FOV per condition (Olympus IX53, LUCPlanFL N, 40 $\times$ ). Significant differences were tested by unpaired t tests ( $^*p < 0.05$ ,  $^{****}p < 0.0001$ ). Data are presented as the mean of 10 FOV  $\pm$  SD. (A) Representative images of chlamydia uptake and inclusion formation 2 and 24 h after infection. Scale bars, 20  $\mu$ m; Ct-LPS (green), Evans blue (red), DAPI (blue). (B) Ratio of chlamydia particles (size = 10–500 px<sup>2</sup>) and nuclei per FOV 2 h after infection. (C) Ratio of chlamydia particles (size = 10–500 px<sup>2</sup>) and nuclei per FOV 24 h after infection. (D) Ratio of chlamydia inclusions (size > 2,000 px<sup>2</sup>) and nuclei per FOV 24 h after infection.

(E) Quantification of Ct uptake with qPCR. HeLa cells were treated with 1 or 5  $\mu$ M Pent and infected with Ct-L2 (no GFP, MOI 100). HeLa cells were harvested 2 or 24 h after infection and ratios of Ct DNA/host DNA were determined ( $n = 3$  independent experiments).

(F–I) Medium containing 10 nM azithromycin (AZT), 100 nM doxy, and 1  $\mu$ M or 5  $\mu$ M Pent was replaced every 24 h supplemented with freshly prepared compounds or just medium. Significant differences were tested by two-way ANOVA with Sidák's multiple comparisons test ( $^*p < 0.05$ ,  $^{**}p < 0.01$ ). (F)

(legend continued on next page)

This suggests that pentamidine permanently inhibits *Ct* growth at an early time point and that it does not only suppress bacterial translation, as it occurs in the presence of macrolides and tetracyclines.

In summary, we show that *Ct* is taken up into pentamidine-treated cells and early steps of inclusion formation occur. However, replication of *Ct* is significantly impaired, and after washout of pentamidine, the inhibitory effect persists.

### Impairment of *Ct* growth by modulation of host cell metabolism

As we did not observe direct disruption of *Ct* by pentamidine, we assessed other mechanisms of pentamidine inhibiting *Ct* growth indirectly via host cells. Solute carriers (SLCs) might be essential for *Ct* growth by providing necessary factors of the bacterial life cycle. The reduced folate carrier SLC19A1 was shown to be transporting antimetabolites like methotrexate and pentamidine.<sup>37</sup> Treatment of SLC19A1<sup>-/-</sup> cells with methotrexate resulted in a loss of anti-chlamydia effects, whereas treatment with pentamidine led to a similar reduction of *Ct* growth as observed in Renilla<sup>-/-</sup> control cells (Figure S6). We therefore conclude that pentamidine and the antifolate methotrexate have different modes of action in their activity against *Ct*.

We tested the possibility that the host metabolism might be influenced by pentamidine in a way that prevents further *Ct* growth in infected cells. We performed Seahorse analysis, using the mitotic stress test kits on HeLa cells treated with pentamidine and infected with *Ct*. When assessing the oxygen consumption rate, we noticed that pentamidine-treated cells have reduced basal respiration and that their spare capacity for mitochondrial respiration is reduced (Figure 4K). Interestingly, infected control cells perform more oxidative phosphorylation at baseline. This difference is not observed in pentamidine-treated samples. Similarly, pentamidine-treated cells perform less glycolysis as shown by the extracellular acidification rate and increased glycolysis in infected control cells, indicating that *Ct* proliferation is reflected by high energy demand by the host cells (Figure 4L). This effect of reduced metabolic activity in pentamidine-treated cells is dose dependent, while doxy-treated cells show similar basal respiration as control cells (Figure 4M). These data illustrate that, by reducing the basal metabolism in host cells via pentamidine, growth of *Ct* within the host cells is inhibited. We next investigated if the metabolic effect of pentamidine results in reduced viability and proliferation of the host cells. By performing lactate dehydrogenase (LDH) assays and fluorescence-activated cell sorting-based viability assays (7-Aminoactinomycin

(7-AAD) staining and CellTrace Violet staining), we observed that HeLa cell viability and proliferation is not affected by pentamidine (Figures S5A–S5C). As HeLa cells are robust cells, we additionally assessed the viability of primary cervical epithelial cells upon pentamidine treatment, which validated our observations from HeLa cells in this more physiologically relevant cell type (Figures S5D and S5E). These data show that the inhibitory effect on bacterial replication observed in pentamidine-treated cells is probably due to metabolic changes within the host cells. However, the drug doses used in our study do not impact the viability and proliferation of HeLa cells and primary cervical epithelial cells as host cells of *Ct*.

### Pentamidine inhibits the growth of *Ng*, while commensals of the physiologic vaginal flora retain replication capacity

As *Ct* and *Ng* infections often coincide, PrEP or PEP strategies are usually designed to be effective against *Ct* and *Ng* infection.<sup>28,30</sup> We therefore assessed the antimicrobial potential of pentamidine against *Ng* as it was reported to have some inhibitory effect on other gram-negative bacteria such as *E. coli*.<sup>42</sup> By treating liquid cultures of *Ng* with pentamidine, we identified the minimal inhibitory concentration between 3.12 and 6.25  $\mu\text{M}$  (Figures 5A and 5B). By spreading the liquid cultures after 24 h of pentamidine treatment on untreated plates, we determined that the minimal inhibitory concentration corresponded to the minimal bactericidal concentration, as regrowth of *Ng* was absent (Figure 5C).

Vaginal dysbiosis is a common side effect of antibiotic treatment.<sup>43</sup> As prophylactic treatment of STIs should not permanently affect the urogenital microbiome, we next assessed the effect of pentamidine on *Lactobacillus acidophilus* as a representative species of the female vaginal flora. We observed reduced growth of the bacteria in the presence of pentamidine; however, the drug did not have a bactericidal effect on *L. acidophilus* in any concentration tested as bacteria grew back after withdrawal of the drug (Figures 5D and 5E). Our data indicate that the bactericidal pentamidine concentrations do not have a lasting detrimental effect on the human female genital tract microbiome.

In summary, we successfully applied a medium-throughput screen to *Ct* infection and validated the most promising compounds in a mouse model for genital *Ct* infection. Pentamidine emerged as the lead candidate demonstrating efficacy against *Ct in vivo* and inhibiting *Ng* growth *in vitro*, all while preserving *L. acidophilus*, a key component of the natural vaginal flora. Furthermore, when applied topically in the *Ct* mouse model,

Representative images of washout experiments 72 h after infection (Olympus IX53, CPlan N, 10 $\times$ ). Scale bars, 100  $\mu\text{m}$ . (G) HeLa cells treated with indicated compounds, analysis 48 h after infection ( $n = 4$  independent experiments, 10 FOV per experiment were analyzed, Olympus IX53, LCach N, 20 $\times$ ). (H) HeLa cells treated with indicated compounds, analysis 72 h after infection ( $n = 3$  independent experiments, 10 FOV per experiment were analyzed, Olympus IX53, LCach N, 20 $\times$ ). (I) Quantification of *Ct* burden with qPCR. HeLa cells were harvested 48 h after infection and ratios of *Ct* DNA/host DNA were determined ( $n = 4$  independent experiments). (J) *Ct* pretreated with pentamidine before infection. HeLa cells were infected with pre-treated *Ct* (for 30 min or 2 h; indicated pentamidine concentration during *Ct*-pretreatment) or HeLa cells were pre-treated with pentamidine 6 h before infection (final concentration of 10 or 1  $\mu\text{M}$  concentration). Quantification of inclusions per FOV (Olympus IX53, LCach N, 20 $\times$ ) normalized to inclusions in untreated control samples ( $n = 2$  independent experiments, expressed as mean of 10 FOV per experiment).

(K–M) Seahorse analysis using the mitotic stress test kit, performed on 8,000 HeLa cells treated with compounds (Ctr = DMSO, 3-fold dilutions of Pent starting at 13.5  $\mu\text{M}$  or 100 nM doxy) and/or *Ct*-L2-GFP (MOI 2.5) for 48 h. Data are pooled replicates from two independent runs ( $n = 14$ –16), mean  $\pm$  SD. (normalized to cell number). (K) Oxygen consumption rate (OCR) in pmol/min. (L) Extracellular acidification rate (ECAR) in mPH/min. (M) Basal respiration of all treatment conditions (OCR).



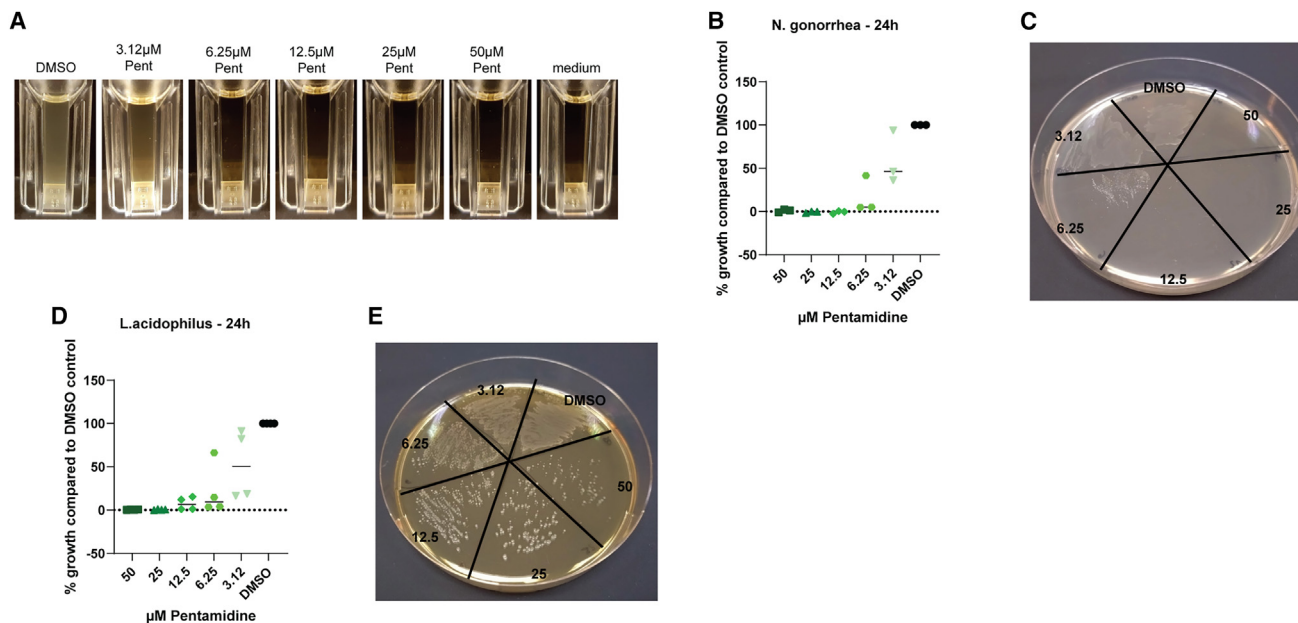

**Figure 5. Pentamidine inhibits *Ng* growth *in vitro* but does not stop the growth of *Lactobacilli***

(A) Liquid 24 h cultures of *Ng* in the presence of 2-fold serial dilutions of Pent (starting at 50 μM).  
 (B) Quantification of growth of *Ng* in Pent-treated cultures in comparison to DMSO control cultures. Data are presented as the means of 3 independent experiments.  
 (C) Representative image of *Ng* bacterial smears derived from Pent-treated 24 h liquid cultures.  
 (D) Quantification of growth of *L. acidophilus* in Pent-treated cultures in comparison to control cultures. Data are presented as the means of 4 independent experiments.  
 (E) Representative image of *L. acidophilus* bacterial smears derived from Pent-treated 24 h liquid cultures.

pentamidine successfully prevented *Ct* infection. However, its mode of action appears to be mediated through the host cells, because direct incubation with pentamidine does not affect *Ct*. Instead, pentamidine modifies the metabolic activity within the host cells. In comparison to azithromycin and doxy, the effect of pentamidine is rapid and long lasting, making it an ideal candidate as topical agent against bacterial STIs in a therapeutic or even prophylactic setting.

## DISCUSSION

In this study, we utilized a medium-throughput discovery screen to evaluate the potential of approximately 2,200 compounds in inhibiting the intracellular growth of *Ct*. As a result, we successfully identified and validated 28 non-antibiotic compounds that demonstrated the ability to reduce *Ct* inclusion formation. Notably, we found that pentamidine, when topically or systemically applied, effectively prevented *Ct* infection *in vivo*.

In their global health sector strategy on STIs, the World Health Organization aims to reduce the global cases of bacterial STIs from 374 million in 2020 to below 150 million until 2030. The main pillars will focus on prevention, screening programs for priority populations, and innovative approaches to treatment and vaccines.<sup>44</sup> Considering the absence of available vaccines against any of the most common bacterial STIs, namely *Ct*, *Ng*, and *Mycoplasma genitalium*, coupled with the escalating antibiotic resistance observed among

these pathogens, it is crucial to investigate novel strategies for STI prevention.

In a similar setup as described in this study, Mojica et al. tested 339 Australian natural products with an mCherry-expressing *Ct* strain.<sup>45</sup> They identified mainly tetrahydroanthraquinone and thiaplakortone compounds as hits, which had been classified as antiparasitic agents against malaria or trypanosomes.<sup>45</sup> We tested our top candidates—pentamidine, dolutegravir, and metergoline—for their efficacy in a mouse model of female genital tract *Ct* infection. Pentamidine was the only compound of the three drugs that significantly reduced *Ct* burden in the mice comparable to antibiotic treatment upon systemic and local treatment. In comparison to the antibacterial activity of metergoline against the intracellular bacterium *Salmonella typhimurium* in a murine *Salmonella* infection model,<sup>46</sup> we did not see a *Ct* growth reduction upon metergoline application *in vivo*. For the intraperitoneal application, we used the same dosage, but the frequency of application was every 24 h, in contrast to the mouse model for *Salmonella* infections where application followed a 12 h interval. Explanations for the absence of effect in our mouse model could be that (1) the agent was not sufficiently concentrated in the female genital epithelium, (2) the dose is not high enough for *Ct* inhibition *in vivo*, or (3) more dosages would be required due to the half-life of metergoline. Dolutegravir was the most effective drug against *Ct in vitro* but did not show an effect in the mouse model for *Ct* infection. Even though the usual application route

is oral, we chose systemic treatment by injection and determined the optimal/maximal dosage based on previous literature using either oral application<sup>47</sup> or injection with dolutegravir equivalents.<sup>48</sup> Dolutegravir was shown to modify the folate metabolism, which might be its potential mode of action during *Ct* infection,<sup>49,50</sup> similarly to methotrexate.<sup>51</sup> Dolutegravir leads to the downregulation of SLC19A1 in placental cells, thereby reducing the uptake of both methotrexate and folic acid.<sup>50</sup> Only 5%–7% of plasma concentration of dolutegravir reaches the cervical tissue, which could be one reason for the lack of activity against *Ct*, as only very low concentrations are needed for its activity against HIV.<sup>52,53</sup> Follow-up experiments could assess if long-acting dolutegravir derivatives can reach a dosage sufficient for chlamydia growth inhibition *in vivo*.<sup>48,54</sup> Recently, the dolutegravir derivative 7-methoxy-4-methyl-6,8-dioxo-N-(3-(1-(2-(trifluoromethyl)phenyl)-1H-1,2,3-triazol-4-yl)phenyl)-3,4,6,8,12,12a-hexahydro-2H-pyrido[1',2':4,5]pyrazino[2,1-b][1,3]oxazine-9-carboxamide (DTHP) was shown to inhibit cancer cell growth in a murine xenograft model after intraperitoneal application.<sup>55</sup> Recognizing the importance of refining the delivery method as well as the dosage for *in vivo* application, our research specifically emphasized pentamidine as a promising prophylactic agent against *Ct*.

The concept of PrEP and PEP proved efficient against STI such as HIV.<sup>56</sup> Recent findings suggest doxy prophylaxis as PEP against bacterial STIs in certain individuals at high risk for STI acquisition.<sup>28–30</sup> A potential caveat with doxy prophylaxis is the development of antibiotic resistance of the pathogens and also commensals. In *C. suis*, which is related to the human-adapted pathogen *Ct*, tetracycline resistance is common. *C. suis* can also infect other hosts than pigs, as infection is documented in humans working in life stock facilities,<sup>57,58</sup> where selective pressure occurs due to the enormous use of antibiotics.<sup>59</sup> In co-infected individuals with *C. suis* and *Ct*, horizontal transfer of the tet(C) gene might occur, which was demonstrated *in vitro* between *C. suis* and other chlamydia strains.<sup>60,61</sup> For *Ng*, antibiotic resistance is very common and even multidrug-resistant strains are frequently observed in some countries. Doxy-PEP reduced *Ng* cases depending on the resistance frequency in the respective study area.<sup>28,30</sup>

We propose pentamidine identified in this study as a promising alternative agent for STI prophylaxis. In a PrEP setting in mice *in vivo*, pentamidine reduced the chlamydial burden similarly to doxy. We observed inhibition of *Ng* growth in the presence of >6.25  $\mu$ M pentamidine. However, minimum inhibitory concentration (MIC) breakpoints and pharmacokinetic or pharmacodynamic models for pentamidine and *Ng* are not established so far. Pentamidine is reported to have antibacterial properties by targeting the bacterial membrane.<sup>42,62</sup> Gram-negative bacteria can become more susceptible to antibiotics by disrupting their membrane and making it permeable for other drugs.<sup>39,62</sup> This synergistic effect of combining pentamidine with antibiotics was shown for *Acinetobacter baumannii* in a mouse model,<sup>39</sup> a finding that could be translated to multidrug-resistant bacteria strains, thereby increasing the treatment options and delaying the development of resistance.<sup>62–66</sup> With regard to potential side effects associated with pentamidine, ongoing advances are being made in the development of pentamidine analogs

that exhibit improved performance in disrupting bacterial membranes while being less cytotoxic to the host organism, thereby increasing their potential as adjuvants for antimicrobial therapies.<sup>67–69</sup> It remains to be investigated if these analogs are also effective against *Ct* as the mechanism of action is probably more complex than just disrupting the membrane of the pathogen.

In the clinics, pentamidine is already used as prophylaxis against pneumocystis pneumonia with either systemic or topical (inhalation) application once every 3–4 weeks. During systemic treatment, pentamidine can have side effects like ventricular arrhythmia, hypotension, nephrotoxicity, or hepatic dysfunction.<sup>70</sup> During local application by inhalation with a nebulizer, it can cause cough, chest pain, difficulty breathing, or skin rash.<sup>70</sup> Nevertheless, also doxy can cause symptoms like headache, nausea, vomiting, diarrhea, skin rash, or bacterial vaginitis. In the mouse model for genital *Ct* infection, we observed bradykinesia and dizziness after systemic treatment with pentamidine, while mice treated only locally did not present with obvious adverse events. *In vitro*, pentamidine has an immediate and long-lasting effect, as *Ct* inclusions do not grow back as observed for the bacteriostatic compounds azithromycin and doxy if treatment is stopped after 24 h. Thus, the bactericidal compound pentamidine might facilitate a long-lasting effect or even better clearance *in vivo*, which would make the application more convenient and less error-prone than daily intake as required for doxy-PrEP or intake after every risk contact as recommended for doxy-PEP. This enhanced effectiveness may be attributed to the ability of pentamidine to enhance the fitness of host cells. Through the utilization of various incubation strategies, encompassing both *Ct* alone and in combination with host cells, we observed that pentamidine may not directly affect *Ct* but rather bolsters the resilience of host cells in combatting this pathogen by reducing the metabolic activity in host cells to a level that does not kill the host but significantly impairs the pathogen. This mechanism holds promise in reducing both the mutation pressure exerted on *Ct* and the development of resistance.

Pentamidine was shown to be effective in a mouse model of *Leishmania* infection after topical application on the skin as a cream formulation.<sup>71</sup> It remains to be tested if pentamidine is suitable for being applied locally to the cervix in form of an ointment, as we dissolved it in 0.9% saline solution and applied it directly into the murine cervix before *Ct* infection. Previous publications describe the development of vaginal microbicides like salicylidene acylhydrazides restricting iron in *Ct* and *Ng* infection or the LPS-binding molecule alkylpolyamine DS-96 blocking *Ct* attachment.<sup>72,73</sup> Approved for other clinical applications, long-term clinical experience is an advantage for our approach to pentamidine treatment. Histopathological assessment revealed that single local treatments do not cause any irritation or organ toxicity in the female reproductive tract. The effect on the local microbiome was assessed by susceptibility testing of *L. acidophilus*, a commensal of the female genital tract, which revealed to survive *Ct* and *Ng*-bactericidal pentamidine dosages. In addition, there is evidence for synergistic effects of pentamidine in combination with antibiotics, which could contribute substantially to reducing total antibiotic load and increase the variability of different antibiotic classes that can be used to treat certain pathogens.

In conclusion, we identified 28 highly effective compounds from diverse substance classes that demonstrated significant efficacy against *Ct in vitro*. Some of these compounds belong to classes that were previously shown to be associated with pathways involved in chlamydia replication. Furthermore, our study provides the first evidence of pentamidine's efficacy in a mouse model of *Ct* infection. Based on these findings, we propose that pentamidine holds potential as an alternative topically or systemically applied agent for prophylactic strategies (PrEP and PEP) not only against *Ct* but also against other bacterial STIs, such as *Ng*, without disrupting the genital flora. Given the substantial increase in *Ng* antibiotic resistance, pentamidine could serve as an adjuvant in combination with antibiotics, offering a backup plan for multi-drug-resistant strains of *Ng* and other bacteria like *Mycoplasma genitalium*. Future endeavors should focus on developing a formulation of pentamidine or one of its analogs suitable for local application in humans or as a low-dosage systemic antibiotic adjuvant. One emphasis will be the development of a pentamidine derivative that exhibits bactericidal properties while minimizing severe side effects linked to the original compound. Additionally, it is crucial to investigate whether lower concentrations of the drug remain effective. It is imperative to investigate the inhibitory effect of pentamidine on other STIs besides *Ct in vivo* and explore the development of resistance to pentamidine.

### Limitations of the study

We provide a proof of concept for the use of pentamidine as a locally active prophylactic agent against *Ct* infection. However, the precise mode of action remains unclear, even though extensive *in vitro* infection experiments revealed that pentamidine most likely acts via metabolic alterations in host cells, thereby limiting the proliferation capacity of bacteria. It remains to be elucidated if long-term treatment and related metabolic alterations lead to toxic side effects in epithelial tissue. Another challenge with pentamidine to prevent STIs is the effect on the local microbiome, which needs to be carefully assessed with other species than *L. acidophilus* and with *in vivo* studies. The next step will be the translation of topical drug application in humans. While pentamidine application is reasonably feasible with creams and suppositories at the penis and anal region, respectively, topical preventative considerations for the female lower genital tract and especially the cervix are more challenging. Possible options include vaginal application by cream, suppository, or sprays that might allow dissemination of pentamidine to the cervix. Developing pentamidine derivatives that are suitable for easy systemic distribution or innovative topical administration are options for future studies in the context of topical pentamidine prophylaxis. Pentamidine as a lead compound could help to identify pentamidine analogs or structurally related compounds using structure-activity relationship studies for similarly active compounds with fewer side effects on host cells and the microbiome.

### STAR★METHODS

Detailed methods are provided in the online version of this paper and include the following:

- KEY RESOURCES TABLE
- RESOURCE AVAILABILITY

- Lead contact
- Materials availability
- Data and code availability
- EXPERIMENTAL MODEL AND STUDY PARTICIPANT DETAILS
  - Bacterial strains and cell culture
  - Mice
- METHOD DETAILS
  - Medium-throughput compound screening
  - Compounds for *in vitro* tests
  - *In vitro* experiments with cell lines
  - Mouse model of *Ct* infection
  - qPCR to assess *Ct* burden
  - Antimicrobial susceptibility testing
  - Chlamydia incidence in HIV cohort receiving DTG
- QUANTIFICATION AND STATISTICAL ANALYSIS

### SUPPLEMENTAL INFORMATION

Supplemental information can be found online at <https://doi.org/10.1016/j.xcrm.2024.101643>.

### ACKNOWLEDGMENTS

We thank all members of the Stary laboratory for discussions and feedback and especially A.E. Aguilar González for preparation of reagents and A. Kopf for her assistance with the confocal microscope. We are grateful to G. Superti-Furga for scientific input and RESOLUTE for providing the HCT116 cell lines. We thank M. Haller and A. Stary from the Outpatients Centre for the Diagnosis of Venero-Dermatological Diseases, Pilzambulatorium Schloßselgasse, Vienna, for sharing the *Ng* strains with us. We are grateful to B. Willinger and B. Selitsch from the Department of Laboratory Medicine of the Medical University of Vienna for providing the *L. acidophilus* strain. This project was supported by the Austrian Science Fund (FWF, P31494) and the Medical Scientific Fund of the Mayor of the City of Vienna (21201). Graphical images were created with BioRender (G.S. owns a license for publishing).

### AUTHOR CONTRIBUTIONS

K.K. planned and conducted the experiments, analyzed the data, and drafted the figures and manuscript. R.K. planned and conducted the experiments and analyzed the data. A.K. conducted screening experiments and analyzed the data. M.S. conducted and analyzed the Seahorse experiments. R.D.-H. conducted the experiments. M.D. performed the histopathological grading. J.S. performed the mass spectrometry experiments. D.C. collected and analyzed patient data of the dolutegravir cohort. M.K. and C.G. recruited patients to obtain primary material and planned experiments. A.B., S.K., H.S., and G.S. provided reagents and revised the manuscript. H.S. and G.S. supervised the project.

### DECLARATION OF INTERESTS

K.K., R.K., A.K., S.K., H.S., and G.S. are inventors on a patent application entitled "Pentamidine in the treatment of genital infections and/or STIs" (EU application number EP 24 177 796.0) filed by the Medical University of Vienna that relates to the use of pentamidine against genital infections.

Received: August 13, 2023

Revised: March 22, 2024

Accepted: June 14, 2024

Published: July 8, 2024

### REFERENCES

1. Roser, M., Ritchie, H., and Spooner, F. (2021). Burden of Disease. <https://ourworldindata.org/burden-of-disease>.

2. el Bcheraoui, C., Mokdad, A.H., Dwyer-Lindgren, L., Bertozzi-Villa, A., Stubbs, R.W., Morozoff, C., Shirude, S., Naghavi, M., and Murray, C.J.L. (2018). Trends and Patterns of Differences in Infectious Disease Mortality Among US Counties, 1980-2014. *JAMA* 319, 1248–1260. <https://doi.org/10.1001/jama.2018.2089>.
3. World Health Organization (2021). Global Progress Report on HIV, Viral Hepatitis and Sexually Transmitted Infections, 2021. <https://www.who.int/publications/item/9789240027077>.
4. Centers for Disease Control and Prevention (2024). Sexually Transmitted Disease Surveillance 2022. <https://www.cdc.gov/std/statistics/>.
5. Bosetti, D., Mugglin, C., Calmy, A., Cavassini, M., Stöckle, M., Braun, D., Notter, J., Haerry, D., Hampel, B., Kovari, H., et al. (2022). Risk Factors and Incidence of Sexually Transmitted Infections in the Swiss HIV Cohort Study. *Open Forum Infect. Dis.* 9, ofac592. <https://doi.org/10.1093/ofid/ofac592>.
6. Wright, S.S., Kreisel, K.M., Hitt, J.C., Pagaoa, M.A., Weinstock, H.S., and Thorpe, P.G. (2022). Impact of the COVID-19 Pandemic on Centers for Disease Control and Prevention-Funded Sexually Transmitted Disease Programs. *Sex. Transm. Dis.* 49, E61–E63. <https://doi.org/10.1097/OLQ.0000000000001566>.
7. Pagaoa, M., Grey, J., Torrone, E., Kreisel, K., Stenger, M., and Weinstock, H. (2021). Trends in Nationally Notifiable Sexually Transmitted Disease Case Reports during the US COVID-19 Pandemic, January to December 2020. *Sex. Transm. Dis.* 48, 798–804. <https://doi.org/10.1097/OLQ.0000000000001506>.
8. Huai, P., Li, F., Chu, T., Liu, D., Liu, J., and Zhang, F. (2020). Prevalence of genital Chlamydia trachomatis infection in the general population: A meta-analysis. *BMC Infect. Dis.* 20, 589. <https://doi.org/10.1186/s12879-020-05307-w>.
9. Newman, L., Rowley, J., Hoorn, S.V., Wijesooriya, N.S., Unemo, M., Low, N., Stevens, G., Gottlieb, S., Kiarie, J., and Temmerman, M. (2015). Global Estimates of the Prevalence and Incidence of Four Curable Sexually Transmitted Infections in 2012 Based on Systematic Review and Global Reporting. *PLoS One* 10, 1–17. <https://doi.org/10.1371/journal.pone.0143304>.
10. Stevens, M.P., Twin, J., Fairley, C.K., Donovan, B., Tan, S.E., Yu, J., Garland, S.M., and Tabrizi, S.N. (2010). Development and evaluation of an ompA quantitative real-time PCR assay for Chlamydia trachomatis serovar determination. *J. Clin. Microbiol.* 48, 2060–2065. <https://doi.org/10.1128/JCM.02308-09>.
11. Gitsels, A., Sanders, N., Vanrompay, D., Dandekar, T., and Ball, S.G. (2019). Chlamydial Infection From Outside to Inside. *Front. Microbiol.* 10, 2329. <https://doi.org/10.3389/fmicb.2019.02329>.
12. Witkin, S.S., Minis, E., Athanasiou, A., Leizer, J., and Linhares, I.M. (2017). Chlamydia trachomatis: the Persistent Pathogen. *Clin. Vaccine Immunol.* 24, e00203-17. <https://doi.org/10.1128/cvi.00203-17>.
13. Bommana, S., and Polkinghorne, A. (2019). Mini review: Antimicrobial control of chlamydial infections in animals: Current practices and issues. *Front. Microbiol.* 10, 113–119. <https://doi.org/10.3389/fmicb.2019.00113>.
14. Hou, C., Jin, Y., Wu, H., Li, P., Liu, L., Zheng, K., and Wang, C. (2022). Alternative strategies for Chlamydia treatment: Promising non-antibiotic approaches. *Front. Microbiol.* 13, 987662. <https://doi.org/10.3389/fmicb.2022.987662>.
15. Dugan, J., Rockey, D.D., Jones, L., and Andersen, A.A. (2004). Tetracycline resistance in Chlamydia suis mediated by genomic islands inserted into the chlamydial inv-like gene. *Antimicrob. Agents Chemother.* 48, 3989–3995. <https://doi.org/10.1128/AAC.48.10.3989-3995.2004>.
16. Unemo, M., and Shafer, W.M. (2014). Antimicrobial resistance in Neisseria gonorrhoeae in the 21st Century: Past, evolution, and future. *Clin. Microbiol. Rev.* 27, 587–613. <https://doi.org/10.1128/CMR.00010-14>.
17. Unemo, M., Lahra, M.M., Escher, M., Eremin, S., Cole, M.J., Galarza, P., Ndowa, F., Martin, I., Dillon, J.A.R., Galas, M., et al. (2021). WHO global antimicrobial resistance surveillance for Neisseria gonorrhoeae 2017–18: a retrospective observational study. *Lancet. Microbe* 2, e627–e636. [https://doi.org/10.1016/S2666-5247\(21\)00171-3](https://doi.org/10.1016/S2666-5247(21)00171-3).
18. Althaus, C.L., Turner, K.M.E., Mercer, C.H., Auguste, P., Roberts, T.E., Bell, G., Herzog, S.A., Cassell, J.A., Edmunds, W.J., White, P.J., et al. (2014). Effectiveness and cost-effectiveness of traditional and new partner notification technologies for curable sexually transmitted infections: Observational study, systematic reviews and mathematical modelling. *Health Technol. Assess.* 18, 1–99. <https://doi.org/10.3310/hta18020>.
19. Leonard, C.A., Schoborg, R.V., Low, N., Unemo, M., and Borel, N. (2019). Pathogenic Interplay Between Chlamydia trachomatis and Neisseria gonorrhoeae that Influences Management and Control Efforts—More Questions than Answers? *Curr. Clin. Microbiol. Rep.* 6, 182–191. <https://doi.org/10.1007/s40588-019-00125-4>.
20. Su, X., Le, W., Zhu, X., Li, S., Wang, B., Madico, G., Yang, Z., Chaisson, C.E., McLaughlin, R.E., Gandra, S., et al. (2022). Neisseria gonorrhoeae Infection in Women Increases With Rising Gonococcal Burdens in Partners: Chlamydia Coinfection in Women Increases Gonococcal Burden. *J. Infect. Dis.* 226, 2192–2203. <https://doi.org/10.1093/infdis/jiac408>.
21. Davies, B., Turner, K.M.E., Frølund, M., Ward, H., May, M.T., Rasmussen, S., Benfield, T., and Westh, H.; Danish Chlamydia Study Group (2016). Risk of reproductive complications following chlamydia testing: a population-based retrospective cohort study in Denmark. *Lancet Infect. Dis.* 16, 1057–1064. [https://doi.org/10.1016/S1473-3099\(16\)30092-5](https://doi.org/10.1016/S1473-3099(16)30092-5).
22. Low, N., Hocking, J.S., and van Bergen, J. (2021). The changing landscape of chlamydia control strategies. *Lancet* 398, 1386–1388. [https://doi.org/10.1016/S0140-6736\(21\)02002-X](https://doi.org/10.1016/S0140-6736(21)02002-X).
23. US Preventive Services Task Force (2021). Screening for Chlamydia and Gonorrhea: US Preventive Services Task Force Recommendation Statement. *JAMA* 326, 949–956. <https://doi.org/10.1001/jama.2021.14081>.
24. Phillips, S., Quigley, B.L., and Timms, P. (2019). Seventy years of Chlamydia vaccine research - Limitations of the past and directions for the future. *Front. Microbiol.* 10, 70. <https://doi.org/10.3389/fmicb.2019.00070>.
25. Abraham, S., Juel, H.B., Bang, P., Cheeseman, H.M., Dohn, R.B., Cole, T., Kristiansen, M.P., Korsholm, K.S., Lewis, D., Olsen, A.W., et al. (2019). Safety and immunogenicity of the chlamydia vaccine candidate CTH522 adjuvanted with CAF01 liposomes or aluminium hydroxide: a first-in-human, randomised, double-blind, placebo-controlled, phase 1 trial. *Lancet Infect. Dis.* 19, 1091–1100. [https://doi.org/10.1016/S1473-3099\(19\)30279-8](https://doi.org/10.1016/S1473-3099(19)30279-8).
26. Luis, M. de la M., Zhong, G., and Brunham, R.C. (2017). Update on Chlamydia trachomatis Vaccinology. *Clin. Vaccine Immunol.* 24, 1–25.
27. de la Maza, L.M., Darville, T.L., and Pal, S. (2021). Chlamydia trachomatis vaccines for genital infections: where are we and how far is there to go? *Expert Rev. Vaccines* 20, 421–435. <https://doi.org/10.1080/14760584.2021.1899817>.
28. Molina, J.M., Charreau, I., Chidiac, C., Pialoux, G., Cua, E., Delaugerre, C., Capitant, C., Rojas-Castro, D., Fonsart, J., Bercot, B., et al. (2018). Post-exposure prophylaxis with doxycycline to prevent sexually transmitted infections in men who have sex with men: an open-label randomised sub-study of the ANRS IPERGAY trial. *Lancet Infect. Dis.* 18, 308–317. [https://doi.org/10.1016/S1473-3099\(17\)30725-9](https://doi.org/10.1016/S1473-3099(17)30725-9).
29. Bolan, R.K., Beymer, M.R., Weiss, R.E., Flynn, R.P., Leibowitz, A.A., and Klausner, J.D. (2015). Doxycycline Prophylaxis to Reduce Incident Syphilis among HIV-Infected Men who have Sex with Men who Continue to Engage in High Risk Sex: A Randomized, Controlled Pilot Study. *Sex. Transm. Dis.* 42, 98–103. <https://doi.org/10.1097/OLQ.0000000000000216>. Doxycycline.
30. Luetkemeyer, A.F., Donnell, D., Dombrowski, J.C., Cohen, S., Grabow, C., Brown, C.E., Malinski, C., Perkins, R., Nasser, M., Lopez, C., et al. (2023). Postexposure Doxycycline to Prevent Bacterial Sexually Transmitted Infections. *N. Engl. J. Med.* 388, 1296–1306. <https://doi.org/10.1056/NEJMoa2211934>.

31. Faris, R., Andersen, S.E., McCullough, A., Gourronc, F., Klingelutz, A.J., and Weber, M.M. (2019). Chlamydia trachomatis Serovars Drive Differential Production of Proinflammatory Cytokines and Chemokines Depending on the Type of Cell Infected. *Front. Cell. Infect. Microbiol.* **9**, 399. <https://doi.org/10.3389/fcimb.2019.00399>.
32. Gondek, D.C., Olive, A.J., and Georg Stary, M.N.S. (2012). CD4+ T cells are necessary and sufficient to confer protection against *C. trachomatis* infection in the murine upper genital tract. *J. Immunol.* **23**, 1–7. <https://doi.org/10.4049/jimmunol.1103032>.
33. Sun, T., and Zhang, Y. (2008). Pentamidine binds to tRNA through non-specific hydrophobic interactions and inhibits aminoacylation and translation. *Nucleic Acids Res.* **36**, 1654–1664. <https://doi.org/10.1093/nar/gkm1180>.
34. Singh, G., and Dey, C.S. (2007). Induction of apoptosis-like cell death by pentamidine and doxorubicin through differential inhibition of topoisomerase II in arsenite-resistant *L. donovani*. *Acta Trop.* **103**, 172–185. <https://doi.org/10.1016/j.actatropica.2007.06.004>.
35. Shapiro, T.A., and Englund, P.T. (1990). Selective cleavage of kinetoplast DNA minicircles promoted by antitypanosomal drugs. *Proc. Natl. Acad. Sci. USA* **87**, 950–954. <https://doi.org/10.1073/pnas.87.3.950>.
36. Basselin, M., Badet-Denisot, M.-A., Lawrence, F., and Robert-Gero, M. (1997). Effects of Pentamidine on Polyamine Level and Biosynthesis in Wild-Type, Pentamidine-Treated, and Pentamidine-Resistant Leishmania. *Exp. Parasitol.* **85**, 274–282. <https://doi.org/10.1006/expr.1996.4131>.
37. Girardi, E., César-razquin, A., Lindinger, S., Papakostas, K., Konecka, J., Hemmerich, J., Kicking, S., Kartnig, F., Gürtl, B., Klavins, K., et al. (2020). A widespread role for SLC transmembrane transporters in resistance to cytotoxic drugs. *Nat. Chem. Biol.* **16**, 469–478. <https://doi.org/10.1038/s41589-020-0483-3>.
38. Waalkes, T.P., and Makulu, D.R. (1976). Pharmacologic aspects of pentamidine. *Natl. Cancer Inst. Monogr.* **43**, 171–177.
39. Stokes, J.M., Macnair, C.R., Ilyas, B., French, S., Côté, J.P., Bouwman, C., Farha, M.A., Sieron, A.O., Whitfield, C., Coombes, B.K., and Brown, E.D. (2017). Pentamidine sensitizes Gram-negative pathogens to antibiotics and overcomes acquired colistin resistance. *Nat. Microbiol.* **2**, 17028. <https://doi.org/10.1038/nmicrobiol.2017.28>.
40. Mital, J., Miller, N.J., Dorward, D.W., Dooley, C.A., and Hackstadt, T. (2013). Role for Chlamydial Inclusion Membrane Proteins in Inclusion Membrane Structure and Biogenesis. *PLoS One* **8**, e63426. <https://doi.org/10.1371/journal.pone.0063426>.
41. Hackstadt, T., Scidmore, M.A., and Rockey, D.D. (1995). Lipid metabolism in Chlamydia trachomatis-infected cells: Directed trafficking of Golgi-derived sphingolipids to the chlamydial inclusion. *Proc. Natl. Acad. Sci. USA* **92**, 4877–4881. <https://doi.org/10.1073/pnas.92.11.4877>.
42. Bichowsky-Slomnitzki, L. (1948). The effect of aromatic disimides on bacterial growth; the mechanism of action. *J. Bacteriol.* **55**, 27–31.
43. Coudray, M.S., and Madhivanan, P. (2020). Bacterial vaginosis—A brief synopsis of the literature. *Eur. J. Obstet. Gynecol. Reprod. Biol.* **245**, 143–148. <https://doi.org/10.1016/j.ejogrb.2019.12.035>.
44. World Health Organization (2022). Global health sector strategies on, respectively, HIV, viral hepatitis and sexually transmitted infections for the period 2022–2030. <https://www.who.int/teams/global-hiv-hepatitis-and-stis-programmes/strategies/global-health-sector-strategies>.
45. Mojica, S.A., Eriksson, A.U., Davis, R.A., Bahnan, W., Elofsson, M., and Gylfe, Å. (2018). Red Fluorescent Chlamydia trachomatis Applied to Live Cell Imaging and Screening for Antibacterial Agents. *Front. Microbiol.* **9**, 3151. <https://doi.org/10.3389/fmicb.2018.03151>.
46. Ellis, M.J., Tsai, C.N., Johnson, J.W., French, S., Elhenawy, W., Porwollik, S., Andrews-Polymenis, H., McClelland, M., Magolan, J., Coombes, B.K., and Brown, E.D. (2019). A macrophage-based screen identifies antibacterial compounds selective for intracellular Salmonella Typhimurium. *Nat. Commun.* **10**, 197. <https://doi.org/10.1038/s41467-018-08190-x>.
47. Heredia, A., Hassounah, S., Medina-Moreno, S., Zapata, J.C., Le, N.M., Han, Y., Foulke, J.S., Davis, C., Bryant, J., Redfield, R.R., and Wainberg, M.A. (2017). Monotherapy with either dolutegravir or raltegravir fails to durably suppress HIV viraemia in humanized mice. *J. Antimicrob. Chemother.* **72**, 2570–2573. <https://doi.org/10.1093/jac/dkx195>.
48. Sillman, B., Bade, A.N., Dash, P.K., Bhargavan, B., Kocher, T., Mathews, S., Su, H., Kanmogne, G.D., Poluektova, L.Y., Gorantla, S., et al. (2018). Creation of a long-acting nanoformulated dolutegravir. *Nat. Commun.* **9**, 443. <https://doi.org/10.1038/s41467-018-02885-x>.
49. Gilmore, J.C., Hoque, M.T., Dai, W., Mohan, H., Dunk, C., Serghides, L., and Bendayan, R. (2022). Interaction between dolutegravir and folate transporters and receptor in human and rodent placenta. *EBioMedicine* **75**, 103771. <https://doi.org/10.1016/j.ebiom.2021.103771>.
50. Cabrera, R.M., Souder, J.P., Steele, J.W., Yeo, L., Tukeman, G., Gorelick, D.A., and Finnell, R.H. (2020). The antagonism of folate receptor by dolutegravir: Developmental toxicity reduction by supplemental folic acid. *AIDS* **34**, 162–163. <https://doi.org/10.1097/QAD.0000000000002407>.
51. Fan, H., Brunham, R.C., and McClarty, G. (1992). Acquisition and synthesis of folates by obligate intracellular bacteria of the genus Chlamydia. *J. Clin. Invest.* **90**, 1803–1811. <https://doi.org/10.1172/JCI116055>.
52. Taha, H., Das, A., and Das, S. (2015). Clinical effectiveness of dolutegravir in the treatment of HIV/AIDS. *Infect. Drug Resist.* **8**, 339–352. <https://doi.org/10.2147/IDR.S68396>.
53. Adams, J.L., Patterson, K.B., Prince, H.M.A., Sykes, C., Greener, B.N., Dumond, J.B., and Kashuba, A.D.M. (2013). Single and Multiple Dose Pharmacokinetics of Dolutegravir in the Genital Tract of HIV Negative Women. *Antivir. Ther.* **18**, 1005–1013. <https://doi.org/10.3851/IMP2665.Single>.
54. Kovarova, M., Benhabbour, S.R., Massud, I., Spagnuolo, R.A., Skinner, B., Baker, C.E., Sykes, C., Mollan, K.R., Kashuba, A.D.M., García-Lerma, J.G., et al. (2018). Ultra-long-acting removable drug delivery system for HIV treatment and prevention. *Nat. Commun.* **9**, 4156. <https://doi.org/10.1038/s41467-018-06490-w>.
55. Wang, W.J., Mao, L.F., Lai, H.L., Wang, Y.W., Jiang, Z.B., Li, W., Huang, J.M., Xie, Y.J., Xu, C., Liu, P., et al. (2020). Dolutegravir derivative inhibits proliferation and induces apoptosis of non-small cell lung cancer cells via calcium signaling pathway. *Pharmacol. Res.* **161**, 105129. <https://doi.org/10.1016/j.phrs.2020.105129>.
56. Krakower, D.S., Jain, S., and Mayer, K.H. (2015). Antiretrovirals for Primary HIV Prevention: The Current Status of Pre- and Post-Exposure Prophylaxis. *Curr. HIV AIDS Rep.* **12**, 127–138. <https://doi.org/10.1053/j.gastro.2016.08.014.CagY>.
57. De Puyseleer, L., De Puyseleer, K., Braeckman, L., Morré, S.A., Cox, E., and Vanrompay, D. (2017). Assessment of Chlamydia suis Infection in Pig Farmers. *Transbound. Emerg. Dis.* **64**, 826–833. <https://doi.org/10.1111/tbed.12446>.
58. De Puyseleer, K., De Puyseleer, L., Dhondt, H., Geens, T., Braeckman, L., Morré, S.A., Cox, E., and Vanrompay, D. (2014). Evaluation of the presence and zoonotic transmission of Chlamydia suis in a pig slaughterhouse. *BMC Infect. Dis.* **14**, 560–566. <https://doi.org/10.1186/s12879-014-0560-x>.
59. Wanninger, S., Donati, M., Di Francesco, A., Hässig, M., Hoffmann, K., Seth-Smith, H.M.B., Marti, H., and Borel, N. (2016). Selective pressure promotes tetracycline resistance of Chlamydia suis in fattening pigs. *PLoS One* **11**, e0166917. <https://doi.org/10.1371/journal.pone.0166917>.
60. Marti, H., Kim, H., Joseph, S.J., Dojiri, S., Read, T.D., and Dean, D. (2017). Tet(C) Gene Transfer between Chlamydia suis Strains Occurs by Homologous Recombination after Co-infection: Implications for Spread of Tetracycline-Resistance among Chlamydiaceae. *Front. Microbiol.* **8**, 156. <https://doi.org/10.3389/fmicb.2017.00156>.
61. Suchland, R.J., Sandoz, K.M., Jeffrey, B.M., Stamm, W.E., and Rockey, D.D. (2009). Horizontal Transfer of Tetracycline Resistance among Chlamydia spp. *In Vitro. Antimicrob. Agents Chemother.* **53**, 4604–4611. <https://doi.org/10.1128/AAC.00477-09>.

62. Wang, B., Pachaiyappan, B., Gruber, J.D., Schmidt, M.G., Zhang, Y., and Woster, P.M. (2018). Antibacterial Diamines Targeting Bacterial Membranes 59, 3140–3151. <https://doi.org/10.1021/acs.jmedchem.5b01912>. Antibacterial.
63. Herrera-Espejo, S., Cebrero-Cangueiro, T., Labrador-Herrera, G., Pachón, J., Pachón-Ibáñez, M.E., and Álvarez-Marín, R. (2020). In vitro activity of pentamidine alone and in combination with antibiotics against multidrug-resistant clinical *Pseudomonas aeruginosa* strains. *Antibiotics* 9, 885. <https://doi.org/10.3390/antibiotics9120885>.
64. Cebrero-Cangueiro, T., Álvarez-Marín, R., Labrador-Herrera, G., Smani, Y., Cordero-Matía, E., Pachón, J., and Pachón-Ibáñez, M.E. (2018). In vitro Activity of Pentamidine Alone and in Combination With Rifampicin, and Doripenem Against Clinical Strains of Carbapenemase-Producing and/or Enterobacteriaceae. *Front. Cell Infect. Microbiol.* 8, 363. <https://doi.org/10.3389/fcimb.2018.00363>.
65. Yu, Y., Zhao, H., Lin, J., Li, Z., Tian, G., Yang, Y.Y., Yuan, P., and Ding, X. (2022). Repurposing Non-Antibiotic Drugs Auranofin and Pentamidine in Combination to Combat Multidrug-Resistant Gram-Negative Bacteria. *Int. J. Antimicrob. Agents* 59, 106582. <https://doi.org/10.1016/j.ijantimicag.2022.106582>.
66. Wu, C., Xia, L., Huang, W., Xu, Y., Gu, Y., Liu, C., Ji, L., Li, W., Wu, Y., Zhou, K., and Feng, X. (2020). Pentamidine sensitizes FDA-approved non-antibiotics for the inhibition of multidrug-resistant Gram-negative pathogens. *Eur. J. Clin. Microbiol. Infect. Dis.* 39, 1771–1779. <https://doi.org/10.1007/s10096-020-03881-0>.
67. MacNair, C.R., Farha, M.A., Serrano-Wu, M.H., Lee, K.K., Hubbard, B., Côté, J.-P., Carfrae, L.A., Tu, M.M., Gaulin, J.L., Hunt, D.K., et al. (2022). Preclinical Development of Pentamidine Analogs Identifies a Potent and Nontoxic Antibiotic Adjuvant. *ACS Infect. Dis.* 8, 768–777. <https://doi.org/10.1021/acsinfecdis.1c00482>.
68. Maciejewska, D., Żabiński, J., Kaźmierczak, P., Wójciuk, K., Kruszewski, M., and Kruszewska, H. (2014). In vitro screening of pentamidine analogs against bacterial and fungal strains. *Bioorg. Med. Chem. Lett.* 24, 2918–2923. <https://doi.org/10.1016/j.bmcl.2014.04.075>.
69. Wesseling, C.M.J., Slingerland, C.J., Veraar, S., Lok, S., and Martin, N.I. (2021). Structure – Activity Studies with Bis-Amidines That Potentiate Gram-Positive Specific Antibiotics against Gram-Negative Pathogens. *ACS Infect. Dis.* 7, 3314–3335. <https://doi.org/10.1021/acsinfecdis.1c00466>.
70. Hafiz, S., and Kyriakopoulos, C. (2023). Pentamidine (StatPearls Publishing).
71. Muñoz, B.Y., Mantilla, J.C., and Escobar, P. (2019). Therapeutic response and safety of the topical, sequential use of antiseptic, keratolytic, and pentamidine creams (3-PACK) on leishmania (viannia) braziliensis-infected mice. *Mem. Inst. Oswaldo Cruz* 114, e180535. <https://doi.org/10.1590/0074-02760180535>.
72. Chu, H., Slepkin, A., Elofsson, M., Keyser, P., de la Maza, L.M., and Peterson, E.M. (2010). Candidate vaginal microbicides with activity against *Chlamydia trachomatis* and *Neisseria gonorrhoeae*. *Int. J. Antimicrob. Agents* 36, 145–150. <https://doi.org/10.1016/j.ijantimicag.2010.03.018>.
73. Osaka, I., and Hefty, P.S. (2014). Lipopolysaccharide-Binding Alkylpolyamine DS-96 Inhibits *Chlamydia trachomatis* Infection by Blocking Attachment and Entry. *Antimicrob. Agents Chemother.* 58, 3245–3254. <https://doi.org/10.1128/AAC.00200-07>.
74. Wang, Y., Kahane, S., Cutcliffe, L.T., Skilton, R.J., Lambden, P.R., and Clarke, I.N. (2011). Development of a Transformation System for *Chlamydia trachomatis*: Restoration of Glycogen Biosynthesis by Acquisition of a Plasmid Shuttle Vector. *PLoS Pathog.* 7, e1002258. <https://doi.org/10.1371/journal.ppat.1002258>.
75. Scidmore, M.A. (2005). Cultivation and Laboratory Maintenance of *Chlamydia trachomatis*. *Curr. Protoc. Microbiol.* 11, Unit 11A.1. <https://doi.org/10.1002/9780471729259.mc11a01s00>.
76. Faris, R., and Weber, M.M. (2019). Propagation and Purification of *Chlamydia trachomatis* Serovar L2 Transformants and Mutants. *Bio. Protoc.* 9, e3459. <https://doi.org/10.21769/bioprotoc.3459>.
77. Klasinc, R., Reiter, M., Digruber, A., Tschulenken, W., Walter, I., Kirschner, A., Spittler, A., and Stockinger, H. (2021). A Novel Flow Cytometric Approach for the Quantification and Quality Control of *Chlamydia trachomatis* Preparations. *Pathogens* 10, 1617. <https://doi.org/10.3390/pathogens10121617>.
78. Ragland, S.A., and Criss, A.K. (2019). Protocols to Interrogate the Interactions Between *Neisseria gonorrhoeae* and Primary Human Neutrophils. *Methods Mol. Biol.* 1997, 319–345. [https://doi.org/10.1007/978-1-4939-9496-0\\_19](https://doi.org/10.1007/978-1-4939-9496-0_19).
79. Zhang, J.-H., Chung, T., and Oldenburg, K.R. (1999). A Simple Statistical Parameter for Use in Evaluation and Validation of High Throughput Screening Assays. *J. Biomol. Screen* 4, 67–73. <https://doi.org/10.1177/108705719900400206>.
80. Warf, M.B., Nakamori, M., Matthys, C.M., Thornton, C.A., and Berglund, J.A. (2009). Pentamidine reverses the splicing defects associated with myotonic dystrophy. *Proc. Natl. Acad. Sci. USA* 106, 18551–18556. <https://doi.org/10.1073/pnas.0903234106>.
81. Stary, G., Olive, A., Radovic-moreno, A.F., Gondek, D., Alvarez, D., Basto, P.A., Perro, M., Vrbanac, V.D., Tager, A.M., Shi, J., et al. (2015). A mucosal vaccine against *Chlamydia trachomatis* generates two waves of protective memory T cells. *Science* 348, aaa8205. <https://doi.org/10.1126/science.aaa8205>.

## STAR★METHODS

### KEY RESOURCES TABLE

| REAGENT or RESOURCE                                  | SOURCE                                                         | IDENTIFIER                        |
|------------------------------------------------------|----------------------------------------------------------------|-----------------------------------|
| <b>Antibodies</b>                                    |                                                                |                                   |
| Ct LPS FITC, clone B410F                             | Invitrogen                                                     | Cat # MA1-7339; RRID: AB_1016792  |
| Ct LPS, clone 512F                                   | Invitrogen                                                     | Cat # MA5-16287; RRID: AB_2537804 |
| Goat anti-mouse IgG AF680                            | Invitrogen                                                     | Cat # A-21058; RRID: AB_2535724   |
| <b>Bacterial and virus strains</b>                   |                                                                |                                   |
| CTL2P-pGFP:pSW2                                      | Chlamydia Biobank                                              | CT401                             |
| Ct serovars L2                                       | DSMZ-German Collection of Microorganisms and Cell Culture GmbH | DSM 19102                         |
| Ct serovars E                                        | DSMZ-German Collection of Microorganisms and Cell Culture GmbH | DSM 19131                         |
| Ct serovars F                                        | DSMZ-German Collection of Microorganisms and Cell Culture GmbH | DSM 19410                         |
| Neisseria gonorrhoea                                 | ATCC                                                           | ATCC 49226                        |
| Lactobacillus acidophilus                            | ATCC                                                           | ATCC 4356                         |
| <b>Biological samples</b>                            |                                                                |                                   |
| Healthy adult cervical tissue                        | Medical University of Vienna                                   | N/A                               |
| <b>Chemicals, peptides, and recombinant proteins</b> |                                                                |                                   |
| Azithromycin                                         | Synovo                                                         | N/A                               |
| C6-NBD Ceramide                                      | Focus Biomolecules/Biotrend                                    | Cat# 10-5496-1mg                  |
| Doxycycline Vibravenös                               | Pfizer                                                         | N/A                               |
| Dolutegravir                                         | MedChemExpress                                                 | Cat# HY-13238                     |
| Cycloheximide                                        | Sigma                                                          | Cat# 01810                        |
| Gastrografin                                         | Bayer                                                          | Cat# 80375310                     |
| Medroxyprogesterone acetate                          | TCA                                                            | Cat# M1964                        |
| Metergoline                                          | Sigma                                                          | Cat# M3668-500MG                  |
| Penicillin                                           | Sigma                                                          | Cat# P3032-1MU                    |
| Pentamidine isethionate                              | Thermo Fisher Scientific                                       | Cat# 461860010                    |
| <b>Critical commercial assays</b>                    |                                                                |                                   |
| CellTrace Violet                                     | Thermo Fisher Scientific                                       | Cat# C34557                       |
| 7-AAD                                                | BD                                                             | Cat# 559925                       |
| LDH-Cytox™ Assay Kit                                 | Biolegend                                                      | Cat# 426401                       |
| QIAamp DNA mini kit                                  | Qiagen                                                         | Cat# 51306                        |
| Phalloidin AF594                                     | Invitrogen                                                     | Cat# A12381                       |
| Luna® Universal Probe qPCR Master Mix                | New England Biolabs                                            | Cat# M3004X                       |
| Seahorse XF Cell Mito Stress Test                    | Agilent                                                        | Cat# 103015-100                   |
| <b>Experimental models: Cell lines</b>               |                                                                |                                   |
| HeLa cells                                           | ATCC                                                           | ATCC® CCL-2™; RRID:CVCL_0030      |
| McCoy cells                                          | ATCC                                                           | ATCC® CRL-1696™; RRID:CVCL_3742   |
| HCT116-SLC19A1-KO-c4                                 | RESOLUTE                                                       | CE0540-U; RRID:CVCL_D4IH          |
| HCT116-Renilla-KO-c1                                 | RESOLUTE                                                       | CE04CG-T                          |

(Continued on next page)

**Continued**

| REAGENT or RESOURCE                    | SOURCE                     | IDENTIFIER                                                                                                                                            |
|----------------------------------------|----------------------------|-------------------------------------------------------------------------------------------------------------------------------------------------------|
| Experimental models: Organisms/strains |                            |                                                                                                                                                       |
| Mouse: C57BL/6Jrj                      | Janvier labs/Charles River | RRID: IMSR_RJ:C57BL-6JRJ                                                                                                                              |
| Oligonucleotides                       |                            |                                                                                                                                                       |
| Primer Ct 16S DNA                      | IDT                        | F: 5'-GGA GGC TGC AGT CGA GAA TCT-3'<br>R: 5'-TTA CAA CCC TAG AGC CTT CAT CAC A-3'<br>Probe: 5'-[6-FAM]-TCG TCA GAC TTC CGT<br>CCA TTG CGA-[TAMRA]-3' |
| Rodent GAPDH VIC                       | Applied Biosystems         | Cat# 4308313                                                                                                                                          |
| Human GAPDH VIC                        | Thermo Fisher Scientific   | Cat# 4448489                                                                                                                                          |
| Software and algorithms                |                            |                                                                                                                                                       |
| FlowJo Version 10.8.1                  | FlowJo                     | <a href="https://www.flowjo.com/">https://www.flowjo.com/</a>                                                                                         |
| Olympus FV31S-SW software              | Olympus                    | <a href="https://www.olympus-lifescience.com/en/support/downloads/">https://www.olympus-lifescience.com/en/support/downloads/</a>                     |
| Prism Version 8 & 9                    | GraphPad Software          | <a href="https://www.graphpad.com/scientific-software/prism/">https://www.graphpad.com/scientific-software/prism/</a>                                 |
| BioRender                              | BioRender                  | <a href="https://www.biorender.com/">https://www.biorender.com/</a>                                                                                   |

**RESOURCE AVAILABILITY**

**Lead contact**

Further information and requests for resources and reagents should be directed to and will be fulfilled by the lead contact, Georg Stary ([georg.stary@meduniwien.ac.at](mailto:georg.stary@meduniwien.ac.at)).

**Materials availability**

This study did not generate new unique reagents.

**Data and code availability**

- All data reported in this paper will be shared by the [lead contact](#) upon request.
- This paper does not report original code.
- Any additional information required to reanalyze the data reported in this paper is available from the [lead contact](#) upon request.

**EXPERIMENTAL MODEL AND STUDY PARTICIPANT DETAILS**

**Bacterial strains and cell culture**

Ct serovar CTL2P-pGFPpSW2 (referred Ct-L2-GFP) was purchased from the Chlamydia Biobank (University of Southampton).<sup>74</sup> Ct serovars L2 (DSM 19102), E (DSM 19131) and F (DSM 19410) were purchased from the DSMZ-German Collection of Microorganisms and Cell Culture GmbH. Serovar Ct-L2-GFP was propagated in McCoy cell monolayers in DMEM supplemented with 10% FBS (Biowest, Nuaille, France), 1x non-essential amino acids (MEM NEAA 100X, Gibco, Thermo Fisher Scientific) in the presence of 10 U ml<sup>-1</sup> penicillin (Sigma, St. Louis, USA) to select for GFP expressing bacteria. Strains L2, E and F were propagated in HeLa cells and 1 μg ml<sup>-1</sup> cycloheximide (Sigma, Burlington, USA) was added to the medium as described previously. All strains were purified using gastrografin (Bayer, Germany) gradient centrifugation and titers were determined as described previously.<sup>75-77</sup> Purified stocks were stored in sucrose-phosphate-glutamate buffer at -80°C and thawed immediately before use (220 mM sucrose, 8.6 mM Na<sub>2</sub>HPO<sub>4</sub>, 3.8 mM KH<sub>2</sub>PO<sub>4</sub> and 5 mM L-glutamic acid).

HeLa cells (ATCC CCL-2) and McCoy cells (ATCC CRL-1696) were maintained in DMEM with 10% FBS. During infection, all cells were cultured in DMEM with 10% FBS (supplemented with 10 U ml<sup>-1</sup> penicillin if Ct-L2-GFP was used). HeLa cells were authenticated using highly polymorphic short tandem repeat loci (STRs).

CRISPR/Cas9 knock out lines of HCT116 cells transduced with sgRNA targeting either SLC19A1 (CE0540-U) or Renilla luciferase (CE04CG-T) cDNA were obtained from RESOLUTE<sup>37</sup> and cultured in RPMI containing 10% FBS. During infection, all cells were cultured in DMEM with 10% FBS (supplemented with 10 U ml<sup>-1</sup> penicillin).

Primary cervical epithelial cells were derived from hysterectomy samples from premenopausal healthy donors which were recruited at the University Hospital, Medical University of Vienna, Austria after obtaining appropriate fully informed written



consent. Cervical biopsies were digested overnight at 4°C with dispase II (2U ml<sup>-1</sup>). Epithelial layer is scraped off with tweezers and cultivated in Keratinocyte Growth Medium-2 (Lonza) and CnT-IsoBoost until the first split (CnT-ISO-50, CELLnTEC). The study was approved by the local ethics committee, Medical University of Vienna (ECS 1503/2020).

For experiments with *Neisseria gonorrhoea*, the fully antibiotics susceptible strain ATCC 49226 was used. *Ng* were cultured on homemade agar plates with gonococcal base medium supplemented with Kellogg's supplement I and II.<sup>78</sup> For experiments with *Lactobacillus acidophilus*, the ATCC 4356 strain was cultured on MRS plates.

### Mice

All mouse experiments were approved by the Institutional Review Board of the Austrian Ministry of Sciences (BMBWF 2020–0.380.439). Female 6–8-week-old C57BL/6JRj mice were purchased from Janvier labs/Charles River and maintained under specific pathogen free conditions in Biosafety Level 2 (BSL-2) facilities at the Medical University of Vienna. Mice were housed in standard cages in a temperature and humidity-controlled room with a 12 h light/dark cycle.

## METHOD DETAILS

### Medium-throughput compound screening

The compound screening was performed in collaboration with the CeMM Molecular Discovery Platform using a customized library of 2167 compounds. The compounds derived from the NIH clinical collection, CeMM library of unique drugs CLOUD, and collections of anti-cancer agents, natural products, epigenetic compounds, metabolites and kinase inhibitors were spotted on 384-well assay plates at concentrations of typically 10 μM (ranging from 10 to 50 μM) in 0.1% DMSO. As positive control, azithromycin at concentrations of 2, 10 and 50 nM was used. 2,000 HeLa cells were seeded per well in 25 μL and incubated for 6 h to ensure adherence of cells. Then, Ct-L2-GFP at MOI 2.5 were added on top in 25 μL suspension and incubated for 42 h. Cells were fixed with 3.7% paraformaldehyde with 1% methanol and stained with 1 μg mL<sup>-1</sup> DAPI and 0.002% Evans blue. Number of nuclei and chlamydia inclusions were counted for each well. Z-factors were calculated using negative controls (DMSO) and positive controls (azithromycin 50 nM) from each plate individually.<sup>79</sup> All plates passed the quality control with Z'<sup>2</sup>>0. By linear regression, the percentage of control (POC) was calculated, setting the mean of negative controls to 100% and the mean signal of positive controls to 0% separately for each plate. Hits were defined as compounds with POC <50 and number of nuclei >100. Compounds with less than 100 nuclei were considered toxic (306 in total).

For the dose response validation, all hits except known antibiotics were tested in an 8-point dose-response in duplicates in 3-fold dilutions typically starting at 13.5 μM. Azithromycin was used at an assay concentration of 67.5 nM. Top hits must fulfill the criteria of POC <60 and the number of nuclei must be >150. The 20 top candidates from the validation screen were tested also in serovar E and F. As for these serovars, a centrifugation step is crucial to obtain sufficient infectivity, the plates were centrifuged for 30 min at 600 g before incubation for 46 h. In experiments with serovars not expressing GFP, cells were permeabilized with a 0.1% saponin/PBS solution for 20 min before immunofluorescence staining with FITC-conjugated anti-Ct LPS monoclonal antibody (B410F, Invitrogen, 1:100) in 0.1% Saponin in PBS +2% BSA for 30 min.

### Compounds for *in vitro* tests

For other assays than medium-throughput screening, the following compounds and suppliers were used: azithromycin (Synovo, Tübingen, Germany), doxycycline (Vibravenös, Pfizer, Pocé-sur-Cisse, France), dolutegravir (MedChemExpress, Monmouth Junction, USA), metergoline (Sigma, St. Louis, USA), pentamidine isethionate (Thermo Fisher Scientific, Germany). Compounds were dissolved in DMSO and diluted in 0.9% NaCl to final concentrations indicated in the respective experiments (final DMSO concentration in the cultures <1%).

### *In vitro* experiments with cell lines

For *in vitro* uptake and washout experiments, HeLa cells were seeded in the presence of pentamidine and infected with Ct-L2 (MOI 100 for uptake, MOI 2.5 for washout) after 6 h. For microscopy, cells were fixed with 4% paraformaldehyde and stained as described for the Ct screen. Acquisition was performed with an Olympus IX53 microscope (LUCPlanFL N, 40x). For qPCR, DNA was isolated with Qiagen DNA mini kit. For viability assays with HeLa cells and primary epithelial cells either calorimetric assays (CellTiter-Glo and LDH-assays) or flow cytometry-based assays (staining with CellTrace Violet and 7-AAD) were used. Cells were cultured in the presence of pentamidine for 48 h before viability was assessed. For CellTrace Violet labeling, 1 million HeLa cells were incubated in 1 mL PBS containing 1 μM CellTrace Violet for 15 min. Cells are washed with 5 mL medium before plating. After harvest, cells were stained with 2.5 μg mL<sup>-1</sup> 7-AAD in PBS for 10 min and directly acquired with a Cytek Aurora flow cytometer. FACS data were analyzed using FlowJo (Version 10.8.1).

For C6-NBD-sphingomyelin staining and confocal microscopy, HeLa cells were treated with 1 μM pentamidine or DMSO in controls for 6 h before infection with Ct-L2 MOI 2.5 (no GFP-expressing). At indicated time points (2 h, 6 h or 18 h after infection), C6-NBD-Ceramide was added to the medium (final concentration 5 μM C6-NBD-Ceramide in 0.05% BSA) and incubated for 30 min at 37°C. Cells were washed 2x with PBS and cells were incubated with fresh DMEM +10% FCS for 60 min at 37°C to allow

back-exchange. Cells are fixed with 4% PFA solution for 20 min at 37°C. Subsequently, cells are stained with anti-Ct-LPS antibody (Clone 512F, Invitrogen, 1.3  $\mu\text{g mL}^{-1}$  in 0.1% Saponin in 2% BSA/PBS) for 30 min. Secondary antibody staining with anti-mouse-IgG (AF680, Invitrogen, 5  $\mu\text{g mL}^{-1}$  in 0.1% Saponin in 2% BSA/PBS) was combined with Phalloidin staining (AF594, Invitrogen, 1:100) for 30 min at RT. After washing with PBS, counterstaining with DAPI for 5 min, coverslips were mounted onto slides. Samples were acquired at a confocal laser scanning microscope (Olympus, FLUOVIEW-FV 3000, equipped with OBIS lasers: 405, 488, 561, 640 nm and  $\times 60$  UPlanXApo objectives and Olympus FV31S-SW software).

For assessment of cellular metabolic activity, we performed a Seahorse XF Cell Mito Stress Test (Agilent). 8,000 HeLa cells were seeded per well in 80  $\mu\text{L}$  DMEM supplemented with 10% FCS in the presence of pentamidine. Cells were incubated for 6 h before adding 80  $\mu\text{L}$  medium containing Ct-L2-GFP (MOI 2.5). Cells are incubated for 40 h at 37°C, 5% CO<sub>2</sub> before exchanging the culture medium with assay medium (Agilent Seahorse DMEM, 1 mM pyruvate, 2 mM glutamine and 10 mM glucose). Plates were incubated for 1 h at 37°C without CO<sub>2</sub> before loading them into the Agilent XFe96 Extracellular Flux Analyzer. The assay was performed using 1  $\mu\text{M}$  oligomycin, 1  $\mu\text{M}$  FCCP and 0.5  $\mu\text{M}$  rotenone/antimycin A.

### Mouse model of Ct infection

Mice were treated with 2.5 mg medroxyprogesterone acetate (MPA; TCA, Tokyo, Japan) in 100  $\mu\text{L}$  PBS subcutaneously 7 days before infection to normalize the estrous cycle. Prophylactic treatment with compounds was started one day before infection and was repeated every 24 h until the end of experiment. The doses chosen for *in vivo* treatment were according to the highest still tolerated systemic doses reported in the literature<sup>46,47,80</sup> and suitable for dilution in small volume for transcervical application. Doses were calculated for an average mouse weight of 20 g in our study. For systemic treatment, doses were 0.8 mg pentamidine, 0.45 mg dolutegravir, 0.25 mg doxy or 0.1 mg metergoline in 100  $\mu\text{L}$  0.9% NaCl containing 10% DMSO administered intraperitoneally. For local treatment, mice received half of the systemic dosage in 15  $\mu\text{L}$  0.9% NaCl with 10% DMSO alone in control conditions or containing 0.4 mg pentamidine, 0.22 mg dolutegravir, 0.125 mg doxy or 0.05 mg metergoline by intrauterine application using an NSET device. For intrauterine infection,  $1 \times 10^6$  IFU of Ct-L2-GFP in sucrose-phosphate-glutamate buffer were added to the local treatment dose and administered to the uterus using an NSET device as previously described.<sup>32</sup> On day 4 after infection, uteri were minced and snap frozen.

For absorption studies, mice were treated once transcervically with 15  $\mu\text{L}$  0.9% NaCl with 0.4 mg pentamidine and organs and serum were harvested 24 h after treatment. Organs were either snap frozen in liquid nitrogen for targeted MS/MS or paraffin embedded for histopathological assessment.

### qPCR to assess Ct burden

To assess the chlamydia burden in the murine uteri or in HeLa cells, DNA was isolated using the QIAamp DNA mini kit (Qiagen) and host GAPDH DNA and chlamydia 16S DNA were quantified by qPCR using Luna Universal Probe qPCR Master Mix (New England Biolabs) on a StepOnePlus Real-Time PCR system (Applied Biosystems, Thermo Fisher Scientific) in a multiplexed manner as previously described.<sup>32,81</sup> Using standard curves from known amounts of Ct and host DNA, the amount of chlamydia DNA (in pg) per unit weight of host DNA (in  $\mu\text{g}$ ) allowed to calculate the ratio of pathogen DNA/host DNA.

### Antimicrobial susceptibility testing

For susceptibility testing of Ng, liquid gonococcal base medium containing Kellogg's supplement I and II and NaHCO<sub>3</sub> was prepared as previously described.<sup>78</sup> Pentamidine was added at a concentration of 3.12, 6.25, 12.5, 25 and 50  $\mu\text{M}$  and samples were inoculated with a 0.5 McFarland bacterial suspension in NaCl 1:100.

For susceptibility testing of *L. acidophilus*, inoculum was prepared by dissolving single colonies in 0.9% NaCl solution at a McFarland standard of 0.5 and using bacterial solution 1:500 in MRS broth containing various pentamidine concentrations.

OD600 was measured after 24 h and growth rate was calculated comparing to optical density of medium only and untreated cultures. To assess bactericidal effect of pentamidine, 5  $\mu\text{L}$  of 24 h liquid cultures treated with various drug concentrations were spread out on fresh agar plates and incubated for 48 h.

### Chlamydia incidence in HIV cohort receiving DTG

For this analysis, all Ct-positive results from 04/2014-11/2020 from males visiting the HIV- and STI-clinic of the Medical University of Vienna were retrospectively evaluated, and patients' characteristics (HIV status and DTG exposure) were retrieved from the medical records. GraphPad Prism 8 was used to perform the statistical analyses. Nominal variables were plotted as number and percentage of patients with a specific feature. To calculate the incidence rate of infections and the respective 95% confidence interval (95% CI), the person-time method was used. Reinfections during the observational period were analyzed using a Kaplan-Meier curve and a log rank test was used to compare the incidence of Ct-reinfections by HIV-status. The presented analysis complies with the ethical standards of the 1964 Declaration of Helsinki and its later amendments. The Local Ethics Committee of the Medical University of Vienna provided the ethical approval (2175/2020). Due to the retrospective design, the need for an informed consent had been waived.

### QUANTIFICATION AND STATISTICAL ANALYSIS

Statistical analysis of medium-throughput screen was done in R calculating Z-factors and linear regression models. All other statistical analyses were done in GraphPad Prism version 9.5.0. If not stated differently, data are expressed as mean  $\pm$  standard deviation (s.d.). For analysis of mouse experiments, outliers were excluded using Grubbs' method with  $\alpha = 0.05$ . One-way ANOVA and Tukey's multiple comparisons were performed to find differences between treatment groups. For comparison between only two groups, unpaired t-tests were performed. For statistical analysis of *in vitro* experiments, two-way ANOVA with matching across row and multiple comparison testing according to Šidák's (comparing 2 means) or Tukey's (more than 2 means) was used.

**Cell Reports Medicine, Volume 5**

**Supplemental information**

**Combination of compound screening with an animal  
model identifies pentamidine to prevent  
*Chlamydia trachomatis* infection**

**Katja Knapp, Romana Klasinc, Anna Koren, Magdalena Siller, Ruth Dingelmaier-Hovorka, Mathias Drach, Juan Sanchez, David Chromy, Marlene Kranawetter, Christoph Grimm, Andreas Bergthaler, Stefan Kubicek, Hannes Stockinger, and Georg Stary**

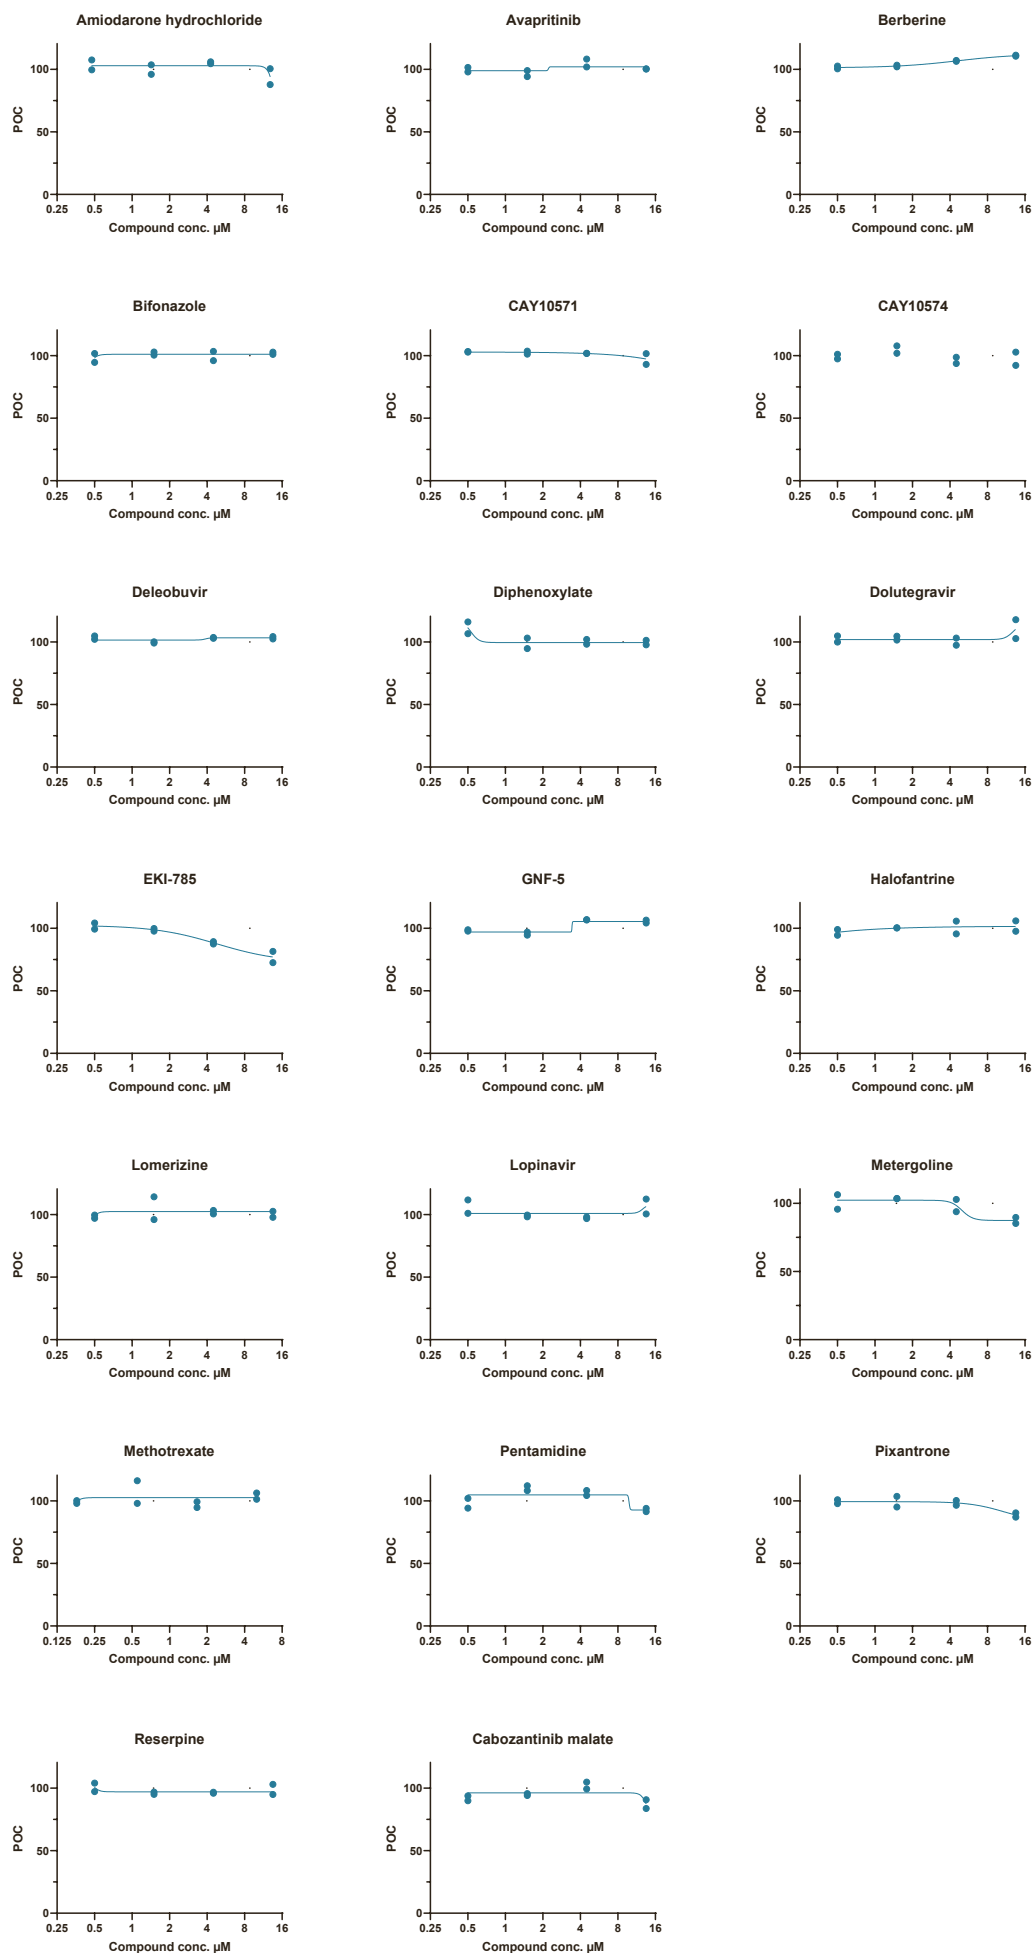

**Figure S1: Cytotoxicity assay with CellTiter-Glo - related to Figure 2.** HeLa cells were treated with compounds in 3-fold serial dilutions starting at 13.5  $\mu\text{M}$  for 48 h to assess their cytotoxicity in the absence of Ct in duplicates. Cell viability was determined by measuring metabolic activity in each well using CellTiter-Glo. Percentage of control (POC) calculation was based on 0.1% DMSO-treated cells (100% viability anticipated).

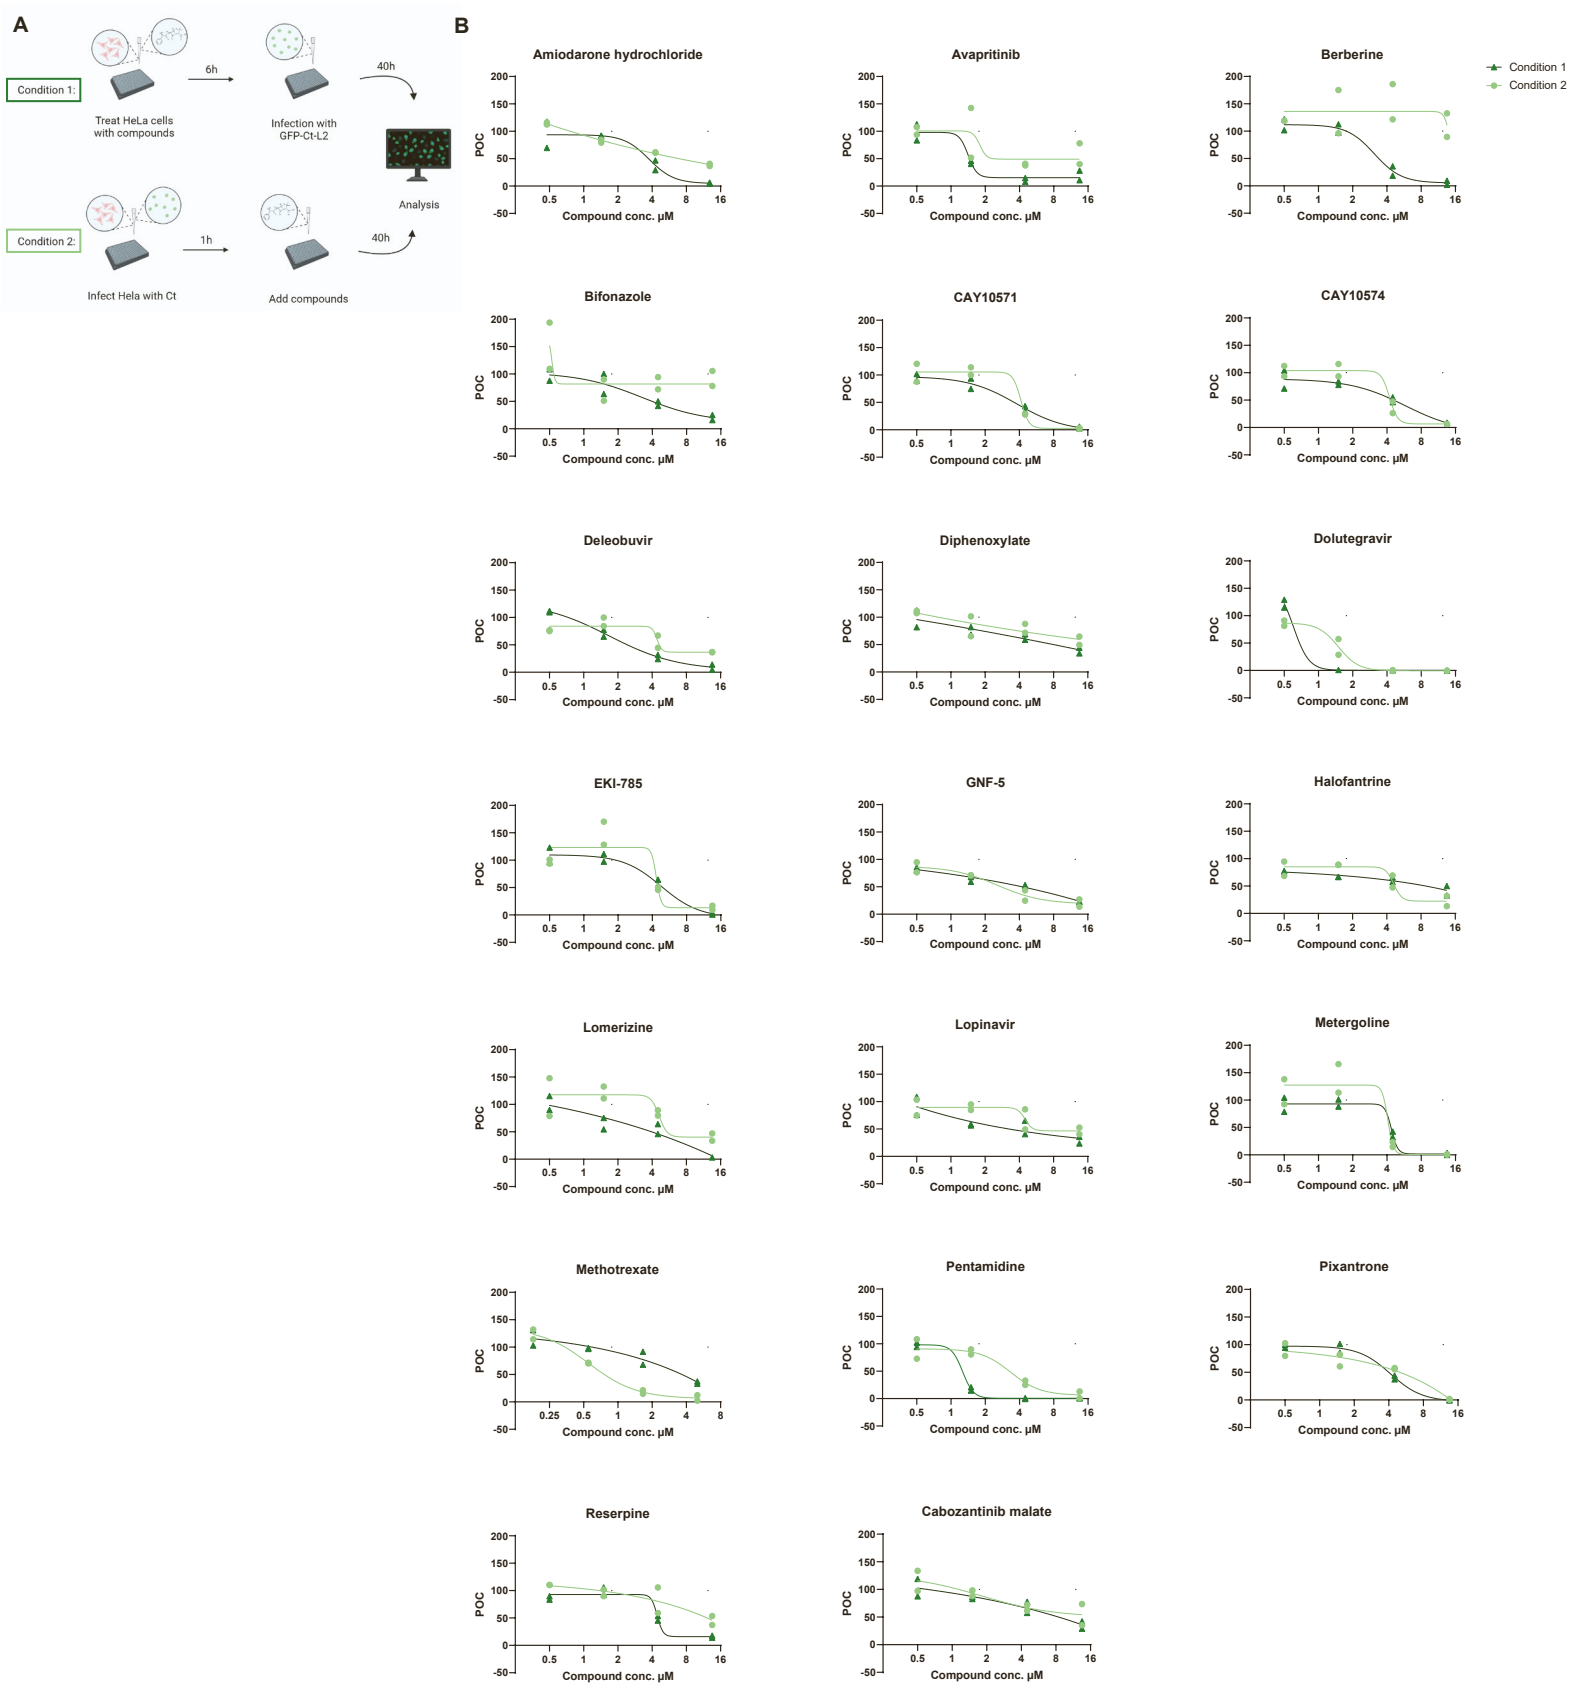

**Figure S2: Addition of compounds before or after Ct infection - related to Figure 2.** To assess the effect of compounds if applied after infection, the top 20 compounds were added in 3-fold serial dilutions starting at 13.5  $\mu\text{M}$  to HeLa cells 1 h after infection with Ct-L2-GFP. The cells were incubated for 42 h and POC was compared with results from the previous dose-response validation screen with compounds being present already before Ct infection. A) Scheme of experimental setup. Created with BioRender. B) Dose response curves in technical duplicates.

A

|                                                                      | N                   | Infections per year including reinfections during follow-up | 95%-CI        |
|----------------------------------------------------------------------|---------------------|-------------------------------------------------------------|---------------|
| Overall episodes of Ct infection                                     | 847                 | 127.05                                                      | 120.24-134.05 |
| HIV negative individuals Episodes of Ct infection                    | 436                 | 60.01                                                       | 60.01-71.15   |
| HIV positive individuals Episodes of Ct infection                    | 411                 | 61.65                                                       | 56.39-67.28   |
| HIV positive individuals with DTG Episodes of Ct infection 42.57%    | 175                 | 26.25                                                       | 22.72-30.24   |
|                                                                      | <u>Standardized</u> | 30.83                                                       |               |
| HIV positive individuals without DTG Episodes of Ct infection 57.42% | 236                 | 35.55                                                       | 56.39-67.28   |
|                                                                      | <u>Standardized</u> | 30.96                                                       |               |

B

| HIV+ with serovar analysis available |       |                  | DTG   |       | Total frequency of serovar in our cohort |
|--------------------------------------|-------|------------------|-------|-------|------------------------------------------|
|                                      |       |                  | No    | yes   |                                          |
| Serovar                              | E     | Count            | 26    | 23    | 49                                       |
|                                      |       | % within serovar | 53.1% | 46.9% | 24,7%                                    |
|                                      | F     | Count            | 4     | 3     | 7                                        |
|                                      |       | % within serovar | 57.1% | 42.9% | 3,5%                                     |
|                                      | G     | Count            | 28    | 22    | 50                                       |
|                                      |       | % within serovar | 56%   | 44%   | 25,3%                                    |
|                                      | J     | Count            | 11    | 15    | 26                                       |
|                                      |       | % within serovar | 42.3% | 57.7% | 13,1%                                    |
|                                      | K     | Count            | 0     | 1     | 1                                        |
|                                      |       | % within serovar | 0%    | 100%  | 0,5%                                     |
|                                      | L1-L3 | Count            | 32    | 33    | 65                                       |
|                                      |       | % within serovar | 49.2% | 50.8% | 32,8%                                    |
| Total                                |       |                  |       |       | 198                                      |
|                                      |       |                  |       |       | 100%                                     |

C

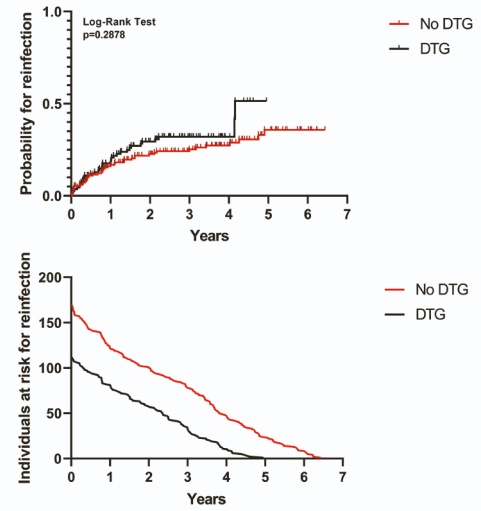

**Figure S3: Chlamydia incidence in HIV+ and HIV- patients with and without dolutegravir (DTG) treatment - related to Figure 3.** A) Table shows the chlamydia infections per year in HIV negative and positive men. HIV positive patients with and without DTG treatment were assessed separately. B) Ct serovar typing of HIV+ patients with and without DTG treatment. (Fishers Exact test: p=0.815) C) Kaplan-Meier curves for the probability for Ct infection (upper chart) and the individual risk for Ct infection (lower chart) are presented.

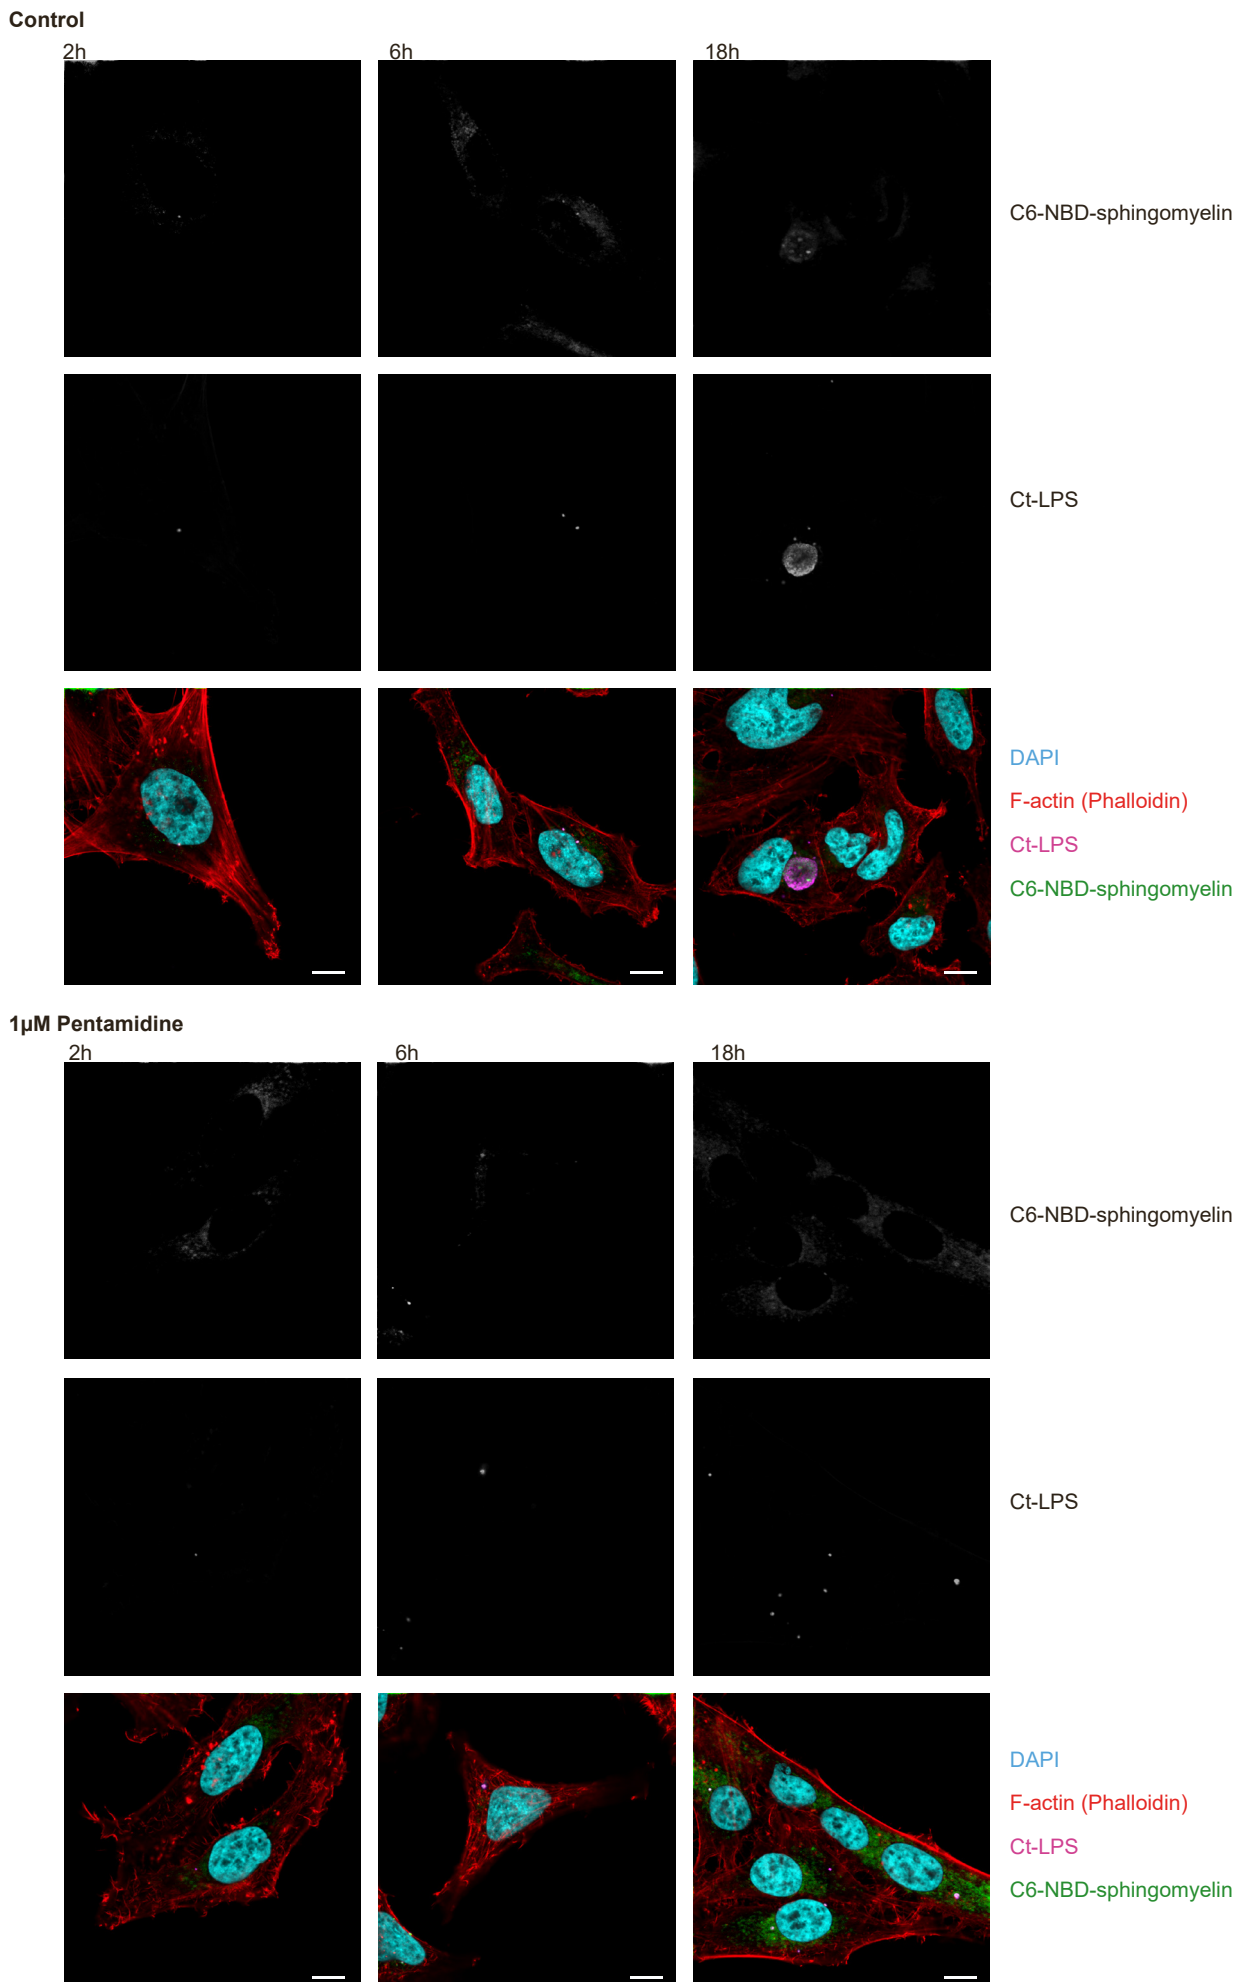

**Figure S4: C6-NBD-sphingomyelin is recruited to inclusions in pentamidine treated cells, but inclusions do not develop further - related to Figure 4.** HeLa cells were treated with 1  $\mu$ M pent or DMSO (Control) for 6 h before infection with Ct-L2 MOI 2.5 (no GFP-expressing). 2 h, 6 h or 18 h after infection, cells were harvested and stained with C6-NBD-Ceramide, anti-Ct-LPS, phalloidin and DAPI. Representative images are shown. Scale bar = 10 $\mu$ m.



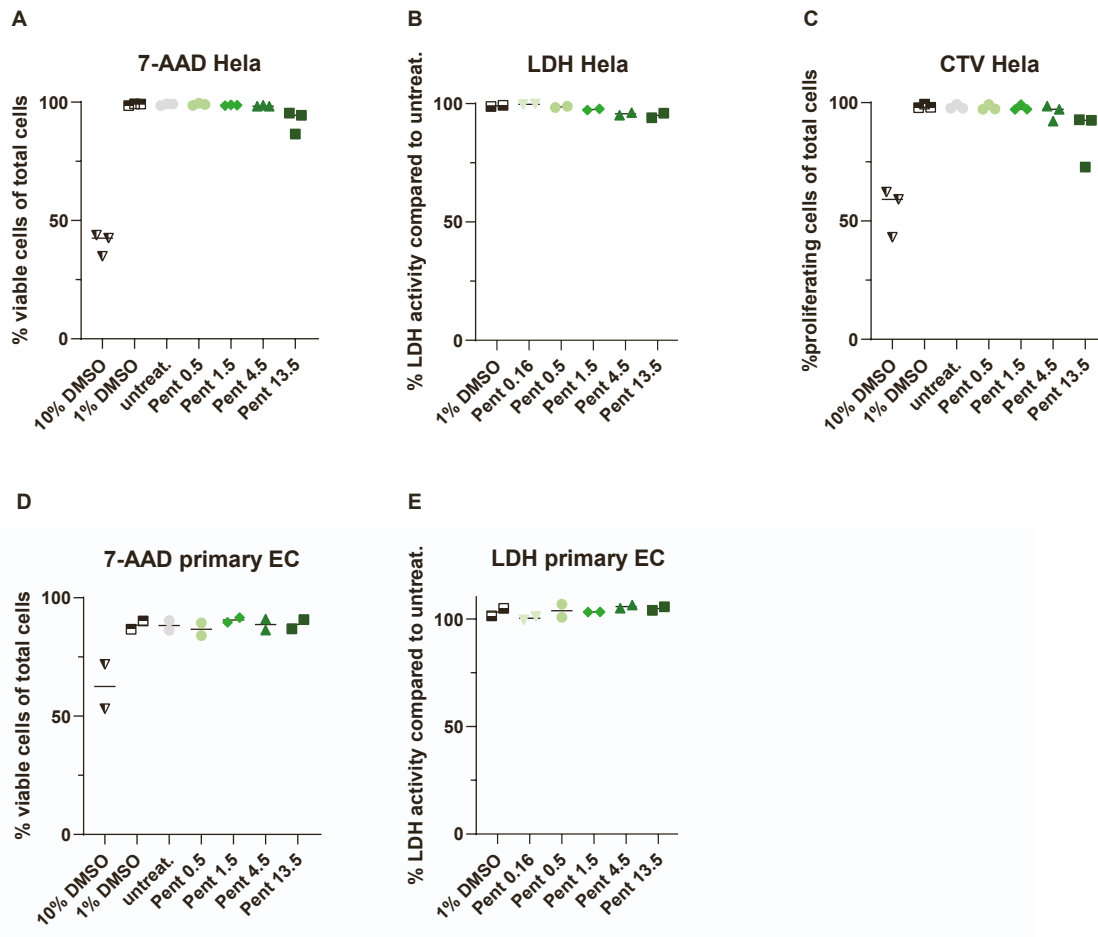

**Figure S5: Viability of HeLa cells and primary EC is not impacted by pentamidine - related to Figure 4.** A-C) HeLa cells were treated with various concentrations of pentamidine (13.5  $\mu\text{M}$  – 0.16  $\mu\text{M}$ ) and DMSO for 48 h. A) Flow-cytometric analysis of 7-AAD negative cells, 3 independent experiments. B) Analysis of LDH-activity in pentamidine treated samples in comparison to untreated cells, 2 independent experiments. C) Flow-cytometric analysis of proliferating cells by assessing dilution of CellTrace Violet (CTV), 3 independent experiments. D-E) primary cervical epithelial cells were treated with various concentrations of pentamidine and DMSO for 48 h. D) Flow-cytometric analysis of 7-AAD negative cells, 2 independent experiments. E) Analysis of LDH-activity in pentamidine treated samples in comparison to untreated cells, 2 independent experiments.

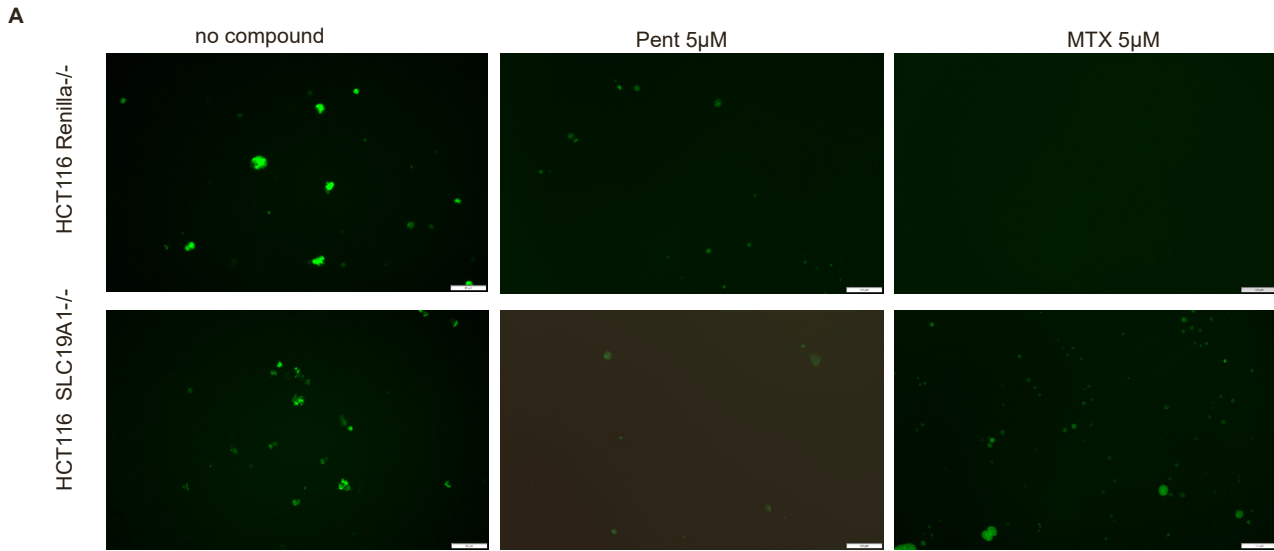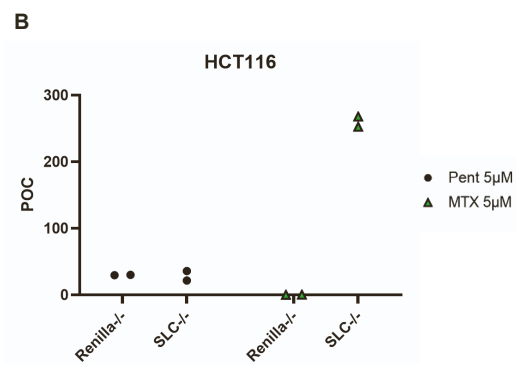

**Figure S6: Pentamidine, in contrast to methotrexate, does not inhibit Ct growth via SLC19A1 - related to Figure 4.** HCT116 Renilla<sup>-/-</sup> and SLC19A1<sup>-/-</sup> (SLC) cells treated with 5 $\mu$ M pentamidine (Pent) or 5  $\mu$ M methotrexate (MTX) 6 h before infection were analyzed 48 h after infection. A) Representative images, scale bar = 100  $\mu$ m. B) Percentage of control (n=2 independent experiments).
